# Supplementary material for: A high-quality genome assembly highlights rye genomic characteristics and agronomically important genes
Source: PubMed Central journal article supplement (PMC8035075; doi:10.1038/s41588-021-00808-z), 2021-03-18
Supplement: 41588_2021_808_MOESM1_ESM.pdf [file 41588_2021_808_MOESM1_ESM.pdf]

**Supplementary information**

---

**A high-quality genome assembly highlights rye genomic characteristics and agronomically important genes**

---

In the format provided by the authors and unedited

## 1 **Supplementary Note**

2  
3 **Generation of BioNano optical molecules.** For generating BioNano optical  
4 molecules, Weining rye high-molecular-weight DNA was treated with the nicking  
5 endonuclease *BspQI* and labeled by fluorescent-dUTP using the IrysPrep Reagent Kit  
6 according to manufacturer's instructions. The labeled molecules were imaged and  
7 analyzed using the BioNano Irys system. A total of fifteen flow cells were run, the  
8 molecules, with a minimum length of 100 kb and a SNR (signal-to-noise ratio) value  
9 higher than 3.5, were retained. The final set of cleaned data were 779.55 Gb including  
10 3,571,570 molecules, with the N50 being 239.8 kb.

11 **Evaluation of genome assembly using BioNano reads.** In the evaluation using  
12 BioNano reads, the optical molecules were mapped to the seven pseudomolecules  
13 using the RefAligner software in the IrysView package with the parameter '-nosplit 2  
14 -BestRef 1 -biaswt 0 -Mfast 0 -FP 1.5 -sf 0.2 -sd 0.0 -A 5 -outlier 1e-4 -endoutlier  
15 1e-3 -S -1000 -sr 0.04 -resbias 5 64 -maxmem 36 -M 3 -minlen 150 -minsites 12  
16 -sort-sizedec -subset 1 2000000 -T 1e-8 -maxthreads 12 -hashgen 5 3 2.4 1.5 0.05 5.0  
17 1 1 2 -hash -hashdelta 10 -hashmaxmem 36 -insertThreads 8 -stdout -stderr'.  
18 Approximately 96.02% of the seven pseudomolecules were covered by BioNano  
19 molecules.

20 **Assessment of genome assembly.** A high-density genetic map, developed using a  
21 cross between two European winter rye cultivars (Lo7 and Lo225)<sup>1</sup>, was used to  
22 assess the accuracy of the Weining rye genome assembly. The 87,820 marker  
23 sequences in the genetic map were searched against Weining genome assembly by  
24 BLASTN using an identity cutoff of 85%, with 79,073 markers anchored onto the  
25 seven Weining rye chromosomes and 6,417 markers mapped to the unanchored  
26 scaffolds. A total of 25,286 markers, which exhibited unique hit in Weining genome  
27 assembly with identity values over 99%, were used to plot the genetic map distance  
28 versus the physical position of Weining rye chromosome assemblies (Supplementary  
29 Fig. 5). The Spearman's rank correlation coefficient between the two maps, calculated  
30 using R, was 0.99 ( $P < 2.2 \times 10^{-16}$ ). Moreover, 194,804 Roche/454 reads of Lo7 with  
31 an average length 400 bp were downloaded from a previous study<sup>1</sup>. Among them,  
32 169,717 had no Ns in their sequences, and used to BLASTN against the Weining  
33 genome assembly. A total of 165,392 (97.45%) reads could be aligned to Weining

34 assembly with an average sequence identity of 97.71% and a mean sequence coverage  
35 of 97.27%.

36 To check the nucleotide accuracy of Weining genome assembly, the 13 Illumina  
37 pair-end library reads (Supplementary Table 3) were aligned to the Weining assembly  
38 using BWA. Alignments were sorted using SAMtools, and the variants were called by  
39 GATK HaplotypeCaller module with the parameter “--minimum-mapping-quality 40  
40 --min-base-quality-score 20 --native-pair-hmm-threads 50”. The identified SNPs and  
41 indels were filtered using VCFtools with the command “--remove-filtered-all  
42 --min-alleles 2 --max-alleles 2 --min-meanDP 5 --max-meanDP 300 --minQ 40”. The  
43 homozygous SNPs and indels identified were used to calculate nucleotide base  
44 accuracy rate of the assembly.

45 LTR\_retriever<sup>2</sup> was used to calculate the LAI score of Weining rye genome  
46 assembly with 3 Mb window size and 300 kb sliding step. For comparison, the same  
47 protocol was applied to calculate the LAI values of the genomes of rice, *T. urartu*, *Ae.*  
48 *tauschii*, *H. vulgare* and the three subgenomes of common wheat (Supplementary Fig.  
49 6). To evaluate the completeness of gene annotations, the 1,440 conserved protein  
50 models in the BUSCO embryophyta\_odb9 dataset<sup>3</sup> were searched against Weining  
51 genome assembly.

52 **Detection and analysis of intact LTR-RTs.** Intact LTR-RTs were identified using  
53 LTR\_retriever. LTRharvest and LTR\_FINDER\_parallel ([https://github.com/oushujun/  
54 LTR\\_FINDER\\_parallel](https://github.com/oushujun/LTR_FINDER_parallel)) were used to identify full length LTR-RT candidates.  
55 LTRharvest was run with the following setting: “-seed 20 -minlenltr 100 -maxlenltr  
56 7000 -similar 85 -mintsd 4 -maxtsd 6 -motif TGCA -motifmis 1 -vic 10 -seqids yes”;  
57 LTR\_FINDER\_parallel was executed with default parameters. The results were  
58 merged together in LTRharvest standard output format, followed by analysis in the  
59 LTR\_retriever pipeline with default parameters. A nucleotide substitution rate of  $1.3 \times$   
60  $10^{-8}$  mutations per site per year was used to estimate the insertion time of intact  
61 LTR-RTs with the formula of  $T = K/2\mu$  as described previously<sup>4,5</sup>, where K is the  
62 divergence rate of 5'-LTR and 3'-LTR estimated by the Jukes-Cantor model.

63 **Identification of centromeric regions.** Previous genome analysis of common wheat  
64 showed that the *Cereba* and *Quinta* families of Gypsy LTRs are concentrated in the  
65 centromeric regions, and can be used to identify centromeres<sup>6</sup>. Thus to identify the

66 centromeric regions of Weining rye chromosomes, the proportion of *Cereba* LTR-TRs  
67 along each chromosome was calculated using a sliding window of 1 Mb size with a  
68 step of 100 kb (i.e., total length of *Cereba* / the window size), which resulted in a total  
69 of 23,903 *Cereba* containing windows for the seven chromosomes. The  
70 99th-percentile value 0.215 of the null distribution of these windows was used as a  
71 cutoff for estimating the centromeric region of each Weining rye chromosome.

72 **Identification of non-coding RNA genes.** The tRNA genes were identified using  
73 tRNAscan-SE v2.0 (<http://lowelab.ucsc.edu/tRNAscan-SE/>). The miRNAs were  
74 found by homology searching (one mismatch allowed) against miRBase (Release 22).  
75 The secondary structures of putative miRNA sequences were predicted by miRDeep2,  
76 with the miRNAs having typical hairpin structures considered to be reliable  
77 candidates. Other non-coding RNAs were predicted with the software Infernal v1.1.2  
78 (<http://eddylab.org/infernal/>) using default parameters.

79 **Identification of transcription factor genes.** The iTAK program<sup>7</sup> was applied to  
80 identify the TF genes of Weining rye based on homology search against the known  
81 plant transcription factor database integrated in the program, with the search results  
82 classified into different TF families. To compare the TF families among different  
83 grass species, iTAK was also applied to compute the TF genes in TaA, TaB, TaD,  
84 DUWA, DUWB, WEWA, WEWB, Tu, Aet, Bd, Hv and Os.

85 **Annotation of disease resistance associated genes.** RGAugury pipeline was used to  
86 screen the HC genes of Weining rye and other grasses in order to identify the DRA  
87 genes<sup>4</sup>. The pipeline first identified the conserved domains or motifs commonly  
88 present in the DRA proteins, including nucleotide binding site (NB-ARC), leucine  
89 rich repeat (LRR), trans-membrane (TM), serine/threonine and tyrosine kinase  
90 (STTK), lysine motif (LysM), coiled-coil (CC), and Toll/ Interleukin-1 receptor (TIR).  
91 Then the candidates were identified and classified into one of the four known major  
92 families: NBS-encoding, trans-membrane and coiled-coil (TM-CC), receptor like  
93 kinase (RLK), and receptor like protein (RLP). The distribution of DRA genes along  
94 Weining rye chromosomes was calculated using a 10 Mb non-overlap sliding window.

95 **QTL mapping.** The heading date was scored for the 295 F2 plants derived from the  
96 Weining × Jingzhou cross. The resultant phenotypic data, together with the genetic  
97 map (Extended Data Fig. 3), were used for QTL mapping with the composite interval

98 mapping method implemented in R/qtl<sup>8</sup>, with a 10 cM scan window and the covariates  
99 of 3 markers. LOD threshold was set by the top 5% quantile based on 1000  
100 permutation tests, and a 1.5 LOD-drop support interval was used for each QTL. The  
101 additive effect and the variation explained by each QTL were determined using the R  
102 function lm. The most significant SNPs were used to estimate QTL effect size.

103 **Analysis of *ScID1*.** Comparison of syntenic genomic regions carrying *ID1* genes in  
104 *Sc*, *Tu*, *Aet*, and *Ta* was conducted using the module *jcvi.compara.synteny* of *MCscan*  
105 (Python version) with "--iter=1" setting. The expression of *ScID1* at 3 DAS time  
106 points was assayed by qRT-PCR, with a primer set recognizing both *ScID1.1* and  
107 *ScID1.2* (Supplementary Table 23). *ScID1* genotyping of individual F2 plants of  
108 Weining × Jingzhou cross was accomplished using a SLAF sequencing generated  
109 SNP marker that was located nearest to the *ScID1* locus. With this marker, three  
110 *ScID1* genotypes, homozygous Weining or Jingzhou *ScID1* (designated as WN/WN  
111 and JZ/JZ, respectively) and heterozygous *ScID1* (WN/JZ), were distinguished, and  
112 the number of F2 plants for the three genotypes was 66, 64, and 161, respectively.  
113 Statistical analysis of heading date data of the three genotypes was executed in R  
114 using two-tailed *t*-test. Multiple amino acid sequence comparison of the ID1 proteins  
115 from *Os*, *Zm*, *Sc*, *Hv*, *Tu*, *Aet*, and *Ta* was carried out with Clustal Omega  
116 (<https://www.ebi.ac.uk/Tools/msa/clustalo/>). Phylogenetic analysis of ID1 proteins  
117 was performed using MEGA X ([www.megasoftware.net/](http://www.megasoftware.net/)), with the phylogenetic tree  
118 constructed using the Maximum Likelihood method and a JTT matrix-based model.

119 **Analysis of ScFT2 phosphorylation in tobacco.** Potential serine, threonine or  
120 tyrosine phosphorylation sites in ScFT2 were predicted using NetPhos 3.1 Server  
121 (<http://www.cbs.dtu.dk/services/NetPhos/>). The residues with a phosphorylation  
122 potential score of above 0.5 (S38, S76, S110, and T132, Supplementary Fig. 4) were  
123 considered for further investigations. For identifying potential phosphorylation sites  
124 conserved among monocot and dicot plants, the FT1 and FT2 proteins from *Sc*, *Bd*,  
125 *Os*, *TaA*, *TaB*, *TaD*, *Aet*, and *Hv*, together with the FT1 protein of *Arabidopsis*  
126 *thaliana*, were subjected to multiple amino acid sequence comparison using the  
127 Clustal Omega (<https://www.ebi.ac.uk/Tools/msa/clustalo/>), which showed that S76  
128 and T132 were strictly conserved among the 17 compared FT proteins

129 (Supplementary Fig. 4). These two residues were thus mutated to create a series of  
130 de-phosphomimic (S76A, T132A, and S76A/T132A) and phosphomimic (S76D,  
131 T132D, and S76D/T132D) mutants, followed by expression in tobacco (*N.*  
132 *benthamiana*) using a PVX vector as described previously<sup>9</sup>. Briefly, the nucleotide  
133 sequences, designed to express MYC-tagged wild type (WT) ScFT2 and six  
134 derivative mutants, were synthesized commercially (Beijing SYKM Gene  
135 Biotechnology Co., Ltd., Beijing, China), and then cloned into the PVX vector  
136 through infusion cloning (<http://bioinfo.clontech.com/infusion/>) with the primers  
137 containing *Cla* I and *Sal* I restriction enzyme digestion sites (Supplementary Table 23).  
138 The resultant recombinant PVXs were each introduced into the leaves of *N.*  
139 *benthamiana* seedlings via agroinfiltration. PVX:GFP, expressing free GFP, was used  
140 as a control. The infiltrated plants were cultured in a growth room set at 23 °C and  
141 with a 16 h light/ 8 h dark photoperiod. They were checked for successful viral  
142 infection at 10 days post infiltration (dpi) by detecting PVX genomic RNAs using  
143 RT-PCR<sup>9</sup>. The number of flowering plants was counted at 25 dpi, with representative  
144 images taken at the same time. The accumulation of WT and mutant ScFT2 proteins  
145 in the tobacco plants was also analyzed at this time by immunoblotting with an  
146 anti-MYC primary antibody (Sigma-Aldrich, C3956). We noted that the MYC-tagged  
147 ScFT2 accumulated in tobacco had a molecular mass of ~23 kDa (Fig. 6g), which was  
148 smaller than the ScFT protein (~29 kDa, Fig. 6d) detected in rye. This difference  
149 indicated that the phosphomodifications of ScFT protein in tobacco and rye differed  
150 to some extent, which requires further study to be understood. Three independent  
151 experiments were performed, with 3 to 8 plants infiltrated per PVX construct per  
152 experiment. The percentages of flowering plants determined for the different PVX  
153 constructs were presented as means ± SE, which were statistically compared to the  
154 control PVX:GFP by a two-tailed Student's *t*-test using *t.test* in R.

155

## 156 **References**

- 157 1. Bauer, E. et al. Towards a whole-genome sequence for rye (*Secale cereale* L.). *Plant J.* **89**,  
158 853-869 (2017).
- 159 2. Ou, S., Chen, J. & Jiang, N. Assessing genome assembly quality using the LTR Assembly Index  
160 (LAI). *Nucleic Acids Res.* **46**, e126 (2018).

- 161 3. Simao, F.A., Waterhouse, R.M., Ioannidis, P., Kriventseva, E.V. & Zdobnov, E.M. BUSCO:  
162 assessing genome assembly and annotation completeness with single-copy orthologs.  
163 *Bioinformatics* **31**, 3210-3212 (2015).
- 164 4. Luo, M.C. et al. Genome sequence of the progenitor of the wheat D genome *Aegilops tauschii*.  
165 *Nature* **551**, 498-502 (2017).
- 166 5. Avni, R. et al. Wild emmer wheat genome architecture and diversity elucidate wheat evolution  
167 and domestication. *Science* **357**, 93-97 (2017).
- 168 6. International Wheat Genome Sequencing Consortium (IWGSC). et al. Shifting the limits in wheat  
169 research and breeding using a fully annotated reference genome. *Science* **361**, pii:eaar7191  
170 (2018).
- 171 7. Zheng, Y. et al. iTAK: A program for genome-wide prediction and classification of plant  
172 transcription factors, transcriptional regulators, and protein kinases. *Mol. Plant* **9**, 1667-1670  
173 (2016).
- 174 8. Arends, D., Prins, P., Jansen, R.C. & Broman, K.W. R/qtl: high-throughput multiple QTL  
175 mapping. *Bioinformatics* **26**, 2990-2 (2010).
- 176 9. Qin, C. et al. A virus-induced assay for functional dissection and analysis of monocot and dicot  
177 flowering time genes. *Plant Physiol.* **174**, 875-885 (2017).

178 **Supplementary Figures**

179

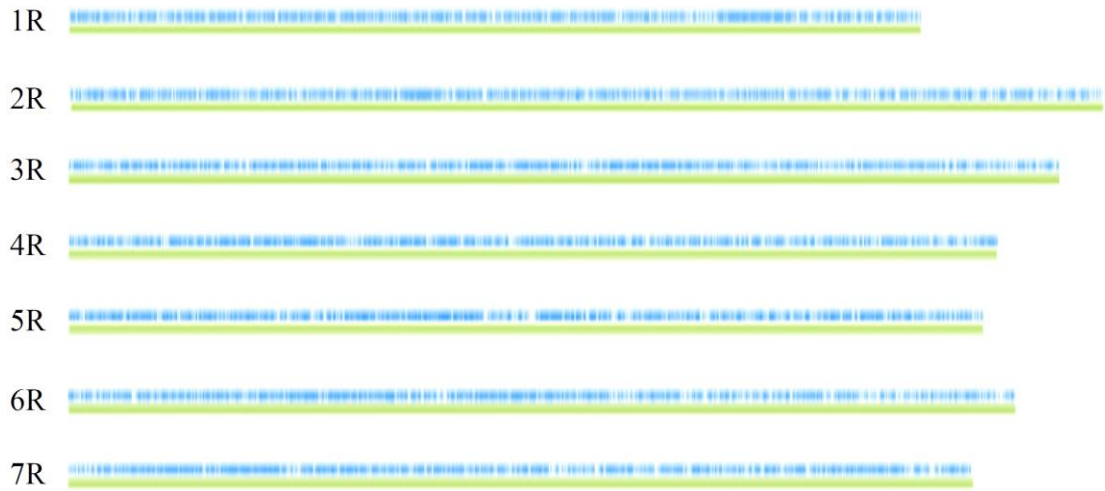

180

181

182 **Supplementary Fig. 1.** Alignment between BioNano reads (top) and the seven assembled  
183 chromosomes (1R-7R) of Weining rye (below). Approximately 96.02% of the physical map was  
184 covered with BioNano molecules.

185



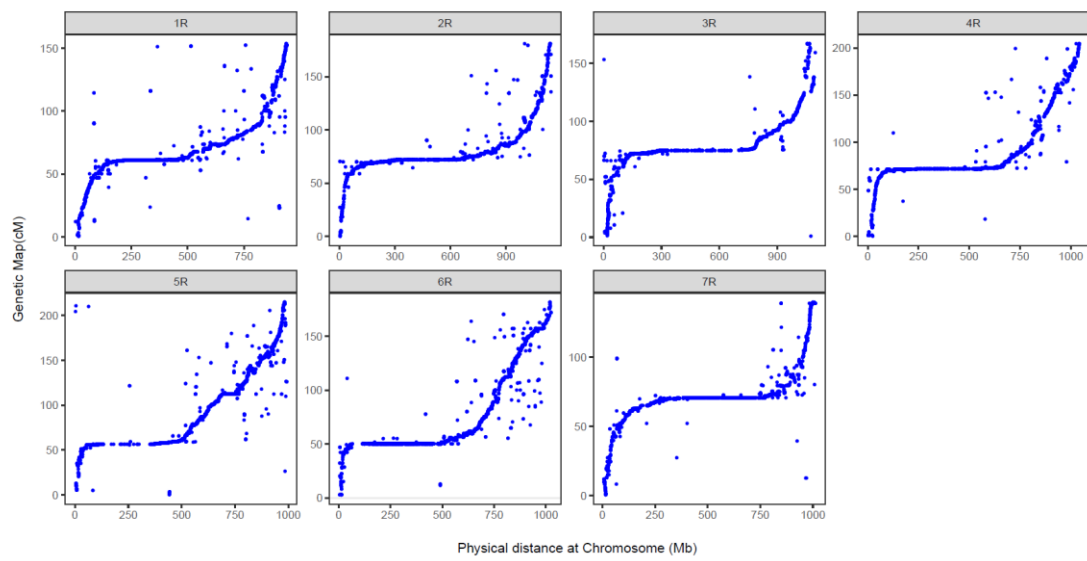

187

188 **Supplementary Fig. 2.** Alignment between the seven assembled chromosomes of Weining rye  
189 and the seven rye linkage groups developed using Lo7 x Lo255 RIL population. The DNA  
190 markers used for constructing the plot were 25,286, which exhibited unique hit in Weining  
191 genome assembly with identity values over 99%.

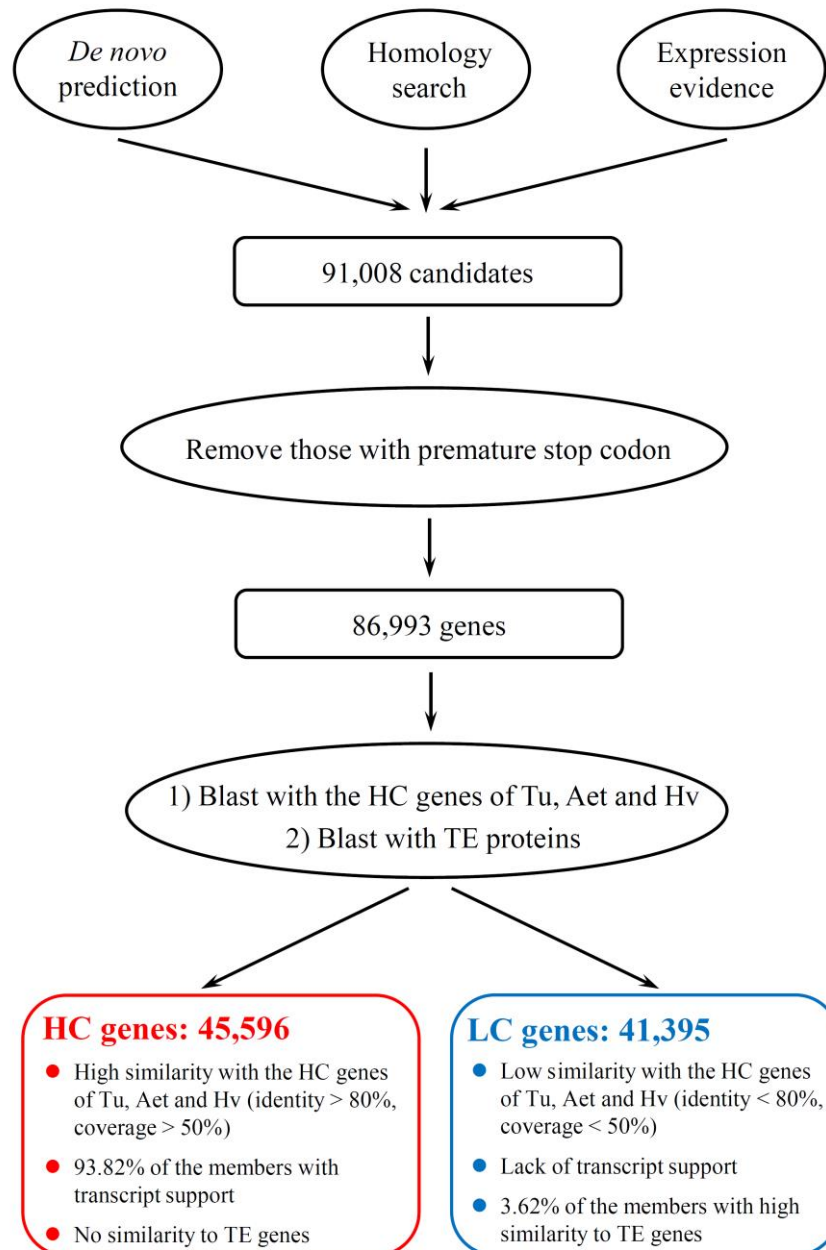

192

193 **Supplementary Fig. 3.** Gene annotation pipeline for Weining rye genome assembly. Three  
 194 different approaches, including Genscan, Augustus (version 2.4) and GlimmerHMM (version  
 195 3.0.4), were employed for *de novo* prediction with default parameters. In the homology-based  
 196 approach, the HC gene models of previously sequenced Triticeae species, including Tu (*T. urartu*),  
 197 Aet (*Ae. tauschii*), Hv (*H. vulgare*), and Ta (*T. aestivum*), were used to annotate Weining rye genes  
 198 with the programs GeneWise and GeMoMa. Expression evidence was obtained through analysis  
 199 of transcriptome sequencing data (Methods).

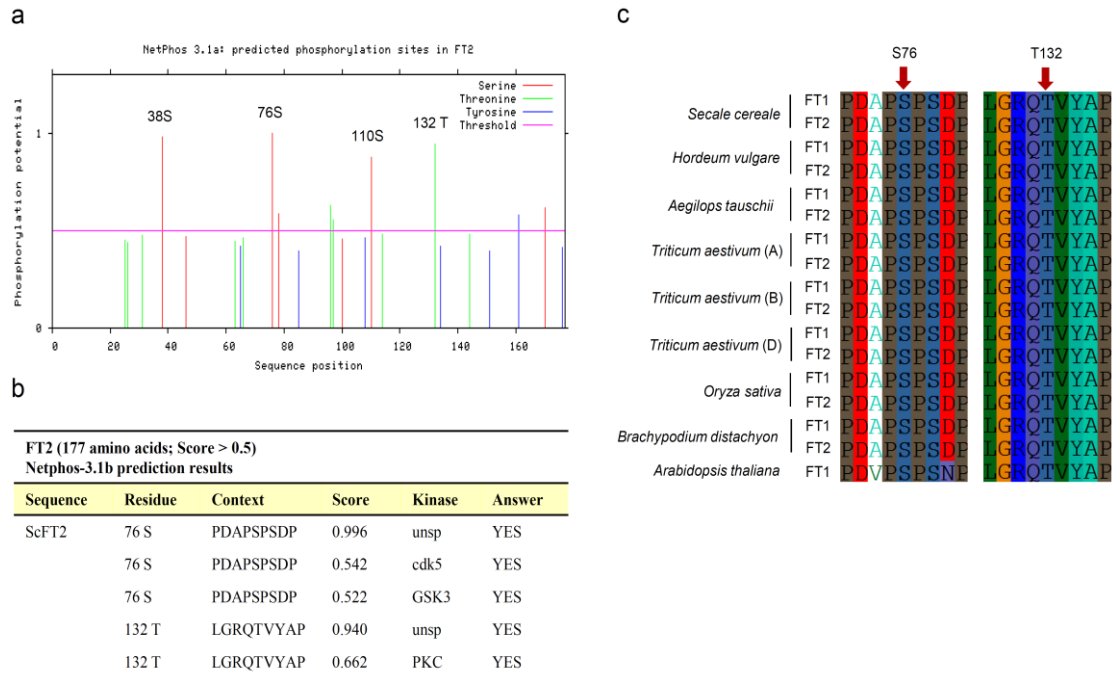

201

202 **Supplementary Fig. 4.** Prediction of potential phosphorylation sites in ScFT2. **(a, b)** The deduced  
 203 protein sequence of ScFT2 was subjected to prediction using the software NetPhos 3.1 Server  
 204 (<http://www.cbs.dtu.dk/services/NetPhos/>) **(a)**. The residues with a phosphorylation potential score  
 205 of above 0.5 (S38, S76, S110, and T132) are listed **(b)**. **(c)** Multiple alignment of the amino acid  
 206 sequences of the FT1 and FT2 proteins from rye, barley (*Hordeum vulgare*), *Aegilops tauschii*, the  
 207 A, B and D subgenomes of common wheat (*Triticum aestivum*), rice (*Oryza sativa*),  
 208 *Brachypodium distachyon*, and *Arabidopsis thaliana*. The alignment was generated using the  
 209 Clustal Omega software (<https://www.ebi.ac.uk/Tools/msa/clustalo/>), which showed that S76 and  
 210 T132 were strictly conserved among the 17 compared FT proteins. Only the relevant portion of the  
 211 alignment is shown. The amino acid sequences of the 17 FT proteins are provided in  
 212 Supplementary Table 24.

213

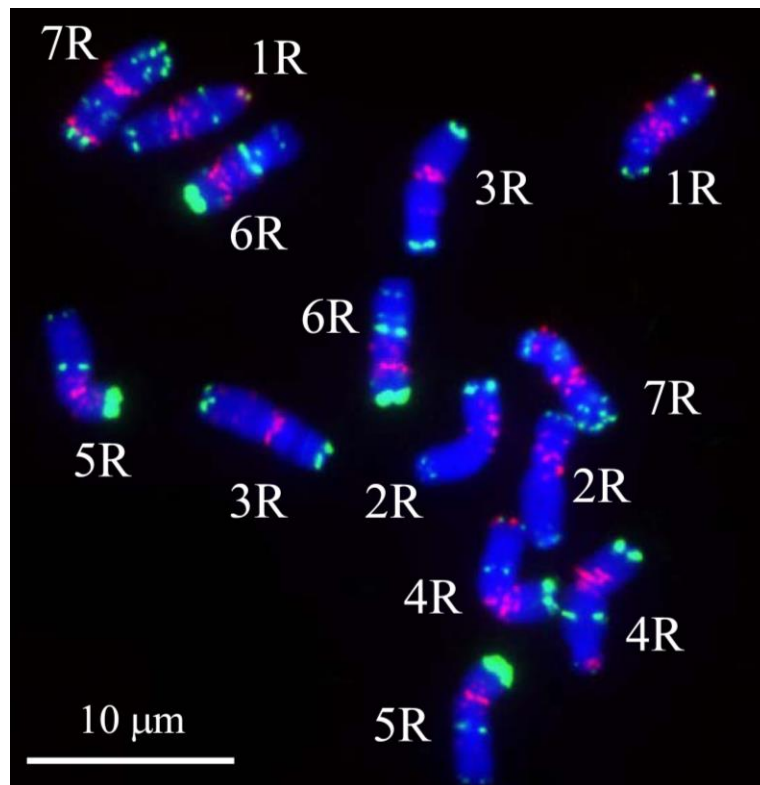

214

215 **Supplementary Fig. 5.** The seven pairs of chromosomes (1R to 7R) of Weining rye. Metaphase  
216 chromosomes in the mitotic root tip cells were hybridized with two fluorescently labeled probes,  
217 pSC119.2 (green) and (AAC)<sub>5</sub> (red), which allowed identification of the seven pairs of rye  
218 chromosomes. The data shown were reproducible in three independent experiments.

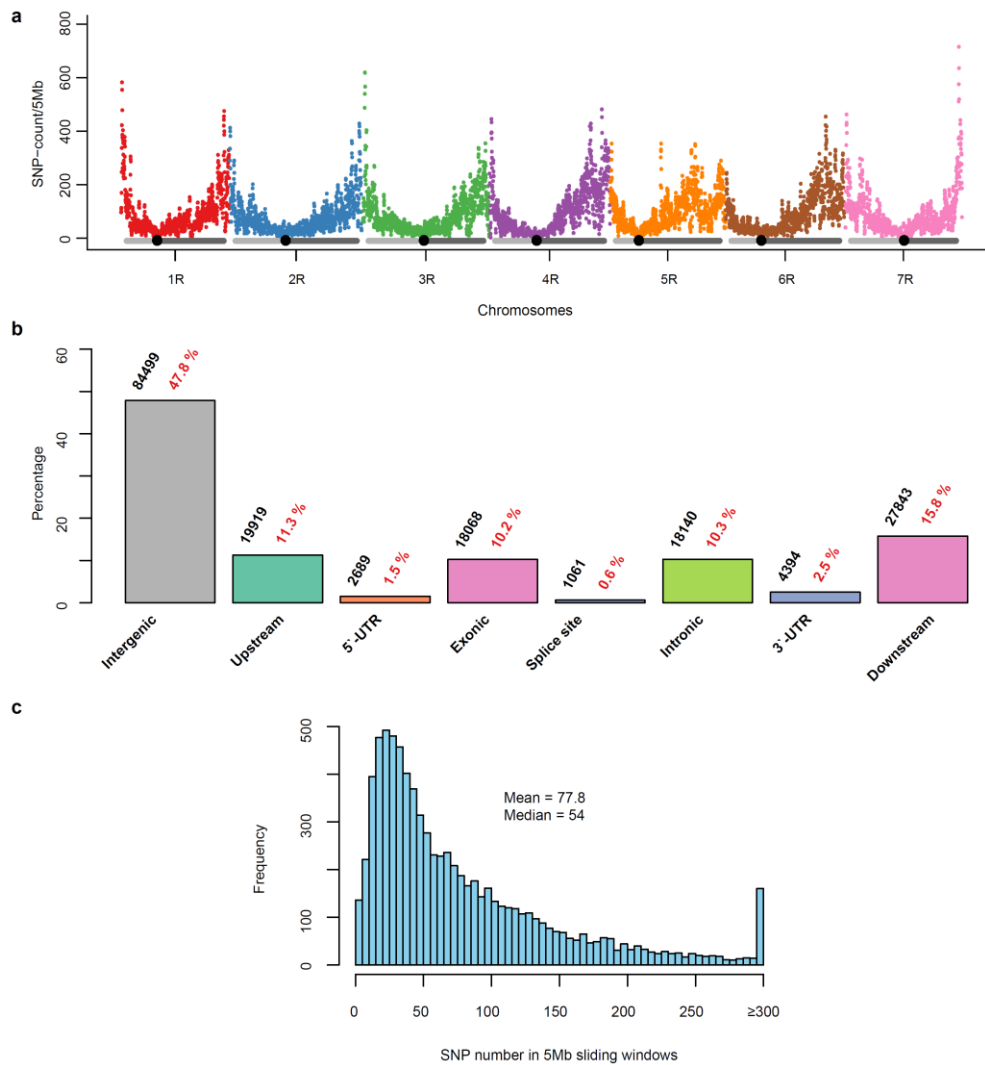

219

220

221 **Supplementary Fig. 6.** Distribution patterns of the SNPs called using the  
 222 genotyping-by-sequencing data of domesticated rye (81 accessions) and three wild *Secale* species  
 223 including *S. vavilovii* (5), *S. strictum* (11), and *S. sylvestre* (4) with Weining genome assembly as  
 224 reference. (a) Distribution patterns of 124,472 chromosomally assigned SNPs on the 1R to 7R  
 225 chromosomes of Weining rye. (b) Distribution of 127,826 SNPs in the intergenic or different genic  
 226 regions of Weining rye as annotated using the SnpEff software ([http://snpeff.sourceforge.net/  
 227 features.html](http://snpeff.sourceforge.net/features.html)). (c) Distribution pattern of the 5 Mb sliding windows containing different numbers  
 228 of SNPs.

229

230 **Supplementary Tables**

231

232 **Supplementary Table 1.** Summary of sequencing platforms used and the data  
233 generated in constructing Weining rye genome sequence

| <b>Platform</b> | <b>Libraries sequenced</b> | <b>Data size</b> | <b>Depth</b> |
|-----------------|----------------------------|------------------|--------------|
| Illumina        | 13                         | 430 Gb           | 54 ×         |
| PacBio          | 120                        | 497 Gb           | 62 ×         |
| Hi-C            | 6                          | 560 Gb           | 70 ×         |
| BioNano         | 15                         | 779 Gb           | 97 ×         |

234

235

**Supplementary Table 2.** Summary of PacBio reads generated in this study

| <b>Length (bp)</b> | <b>Number</b>     | <b>Total length (bp)</b> | <b>Average length (bp)</b> |
|--------------------|-------------------|--------------------------|----------------------------|
| 0 - 2000           | 9,186,702         | 11,237,416,294           | 1,223                      |
| 2000 - 4000        | 10,913,437        | 32,294,858,639           | 2,959                      |
| 4000 - 6000        | 8,762,119         | 43,565,621,971           | 4,972                      |
| 6000 - 8000        | 8,393,934         | 58,673,408,931           | 6,990                      |
| 8000 - 10000       | 6,640,491         | 59,442,959,031           | 8,952                      |
| 10000 - 12000      | 5,325,504         | 58,431,134,186           | 10,972                     |
| 12000 - 14000      | 4,201,538         | 54,392,496,752           | 12,946                     |
| 14000 - 16000      | 2,946,672         | 44,015,688,923           | 14,937                     |
| 16000 - 18000      | 2,018,402         | 34,181,945,704           | 16,935                     |
| > 18000            | 4,353,731         | 100,781,681,018          | 23,148                     |
| <b>Total</b>       | <b>62,742,530</b> | <b>497,017,211,449</b>   | <b>7,922</b>               |
| Reads N50 (bp)     | 11,484            | -                        | -                          |
| Max length (bp)    | 180575            | -                        | -                          |

**Supplementary Table 3.** Summary of Illumina Hiseq X Ten data

| Library  | Data (Gb) | Depth (×) | Q20 (%) | Q30 (%) |
|----------|-----------|-----------|---------|---------|
| 270bp_1  | 32.67     | 4.08      | 95.03   | 88.56   |
| 270bp_2  | 34.52     | 4.32      | 95.14   | 88.75   |
| 270bp_3  | 35.79     | 4.47      | 95.13   | 88.73   |
| 270bp_4  | 33.24     | 4.16      | 95.02   | 88.52   |
| 270bp_5  | 31.38     | 3.92      | 95.18   | 88.53   |
| 270bp_6  | 36.36     | 4.55      | 95.36   | 88.93   |
| 270bp_7  | 37.64     | 4.71      | 94.93   | 88.12   |
| 270bp_8  | 32.60     | 4.08      | 95.06   | 88.34   |
| 270bp_9  | 35.16     | 4.40      | 96.50   | 91.43   |
| 270bp_10 | 37.76     | 4.72      | 96.52   | 91.43   |
| 270bp_11 | 35.39     | 4.42      | 96.51   | 91.45   |
| 270bp_12 | 31.00     | 3.88      | 96.54   | 91.50   |
| 270bp_13 | 16.44     | 2.06      | 96.57   | 91.61   |
| Total    | 429.95    | 53.74     | -       | -       |



241 **Supplementary Table 4.** Summary of Hi-C data and mapping

| <b>Library<sup>1</sup></b> |           | <b>Total read pairs</b> | <b>Mapped reads</b> | <b>Unique mapped read pairs</b> | <b>Valid interaction pairs</b> | <b>Dangling end pairs</b> | <b>Re-ligation pairs</b> | <b>Self-cycle pairs</b> | <b>Dumped pairs</b> |
|----------------------------|-----------|-------------------------|---------------------|---------------------------------|--------------------------------|---------------------------|--------------------------|-------------------------|---------------------|
| H01                        | Size (bp) | 268,366,265             | 485,799,666         | 68,204,581                      | 44,632,071                     | 17,367,681                | 950,051                  | 543,665                 | 4,711,113           |
|                            | Ratio (%) | 100                     | 90.51               | 25.41                           | 65.44                          | 25.46                     | 1.39                     | 0.8                     | 6.91                |
| H02                        | Size (bp) | 314,244,148             | 572,100,640         | 82,794,586                      | 54,169,599                     | 20,781,274                | 1,141,282                | 718,454                 | 5,983,977           |
|                            | Ratio (%) | 100                     | 91.03               | 26.35                           | 65.43                          | 25.1                      | 1.38                     | 0.87                    | 7.23                |
| H03                        | Size (bp) | 341,464,950             | 622,771,703         | 90,309,721                      | 60,171,383                     | 21,614,830                | 1,234,076                | 746,632                 | 6,542,800           |
|                            | Ratio (%) | 100                     | 91.19               | 26.45                           | 66.63                          | 23.93                     | 1.37                     | 0.83                    | 7.24                |
| H04                        | Size (bp) | 318,374,313             | 578,562,280         | 81,816,807                      | 51,481,494                     | 23,067,405                | 1,160,328                | 756,034                 | 5,351,546           |
|                            | Ratio (%) | 100                     | 90.86               | 25.7                            | 62.92                          | 28.19                     | 1.42                     | 0.92                    | 6.54                |
| H05                        | Size (bp) | 277,499,548             | 499,896,565         | 69,843,529                      | 43,739,691                     | 19,814,454                | 1,008,909                | 592,303                 | 4,688,172           |
|                            | Ratio (%) | 100                     | 90.07               | 25.17                           | 62.63                          | 28.37                     | 1.44                     | 0.85                    | 6.71                |
| H06                        | Size (bp) | 349,117,671             | 608,189,002         | 84,050,346                      | 74,262,643                     | 7,900,708                 | 695,877                  | 118,145                 | 1,072,973           |
|                            | Ratio (%) | 100                     | 87.1                | 24.08                           | 88.35                          | 9.4                       | 0.83                     | 0.14                    | 1.28                |

242 <sup>1</sup>Five parallel Hi-C libraries (H01-H05) were constructed with the restriction enzyme *DpnI* (5'-GA<sup>m</sup>↓TC3'), with the H06 library developed using the restriction enzyme *HindIII*  
243 (5'-A↓AGCTT-3').

244 **Supplementary Table 5.** Seven largest chromosome scale super scaffolds  
 245 ordered and orientated using Hi-C data

| <b>Super scaffold</b>      | <b>Number of contigs ordered and orientated</b> |                          |
|----------------------------|-------------------------------------------------|--------------------------|
|                            | <b>Contig number</b>                            | <b>Total length (bp)</b> |
| Lachesis Group0 (Chr4)     | 9,328                                           | 1,075,009,153            |
| Lachesis Group1 (Chr7)     | 8,181                                           | 1,036,064,969            |
| Lachesis Group2 (Chr2)     | 11,345                                          | 1,172,237,068            |
| Lachesis Group3 (Chr3)     | 8,673                                           | 1,121,865,493            |
| Lachesis Group4 (Chr6)     | 10,013                                          | 1,055,758,236            |
| Lachesis Group5 (Chr1)     | 9,035                                           | 964,780,726              |
| Lachesis Group6 (Chr5)     | 9,344                                           | 1,027,035,830            |
| Total clustered            | 65,919                                          | 745,2751,475             |
| Ratio (%)                  | 68.40                                           | 94.38                    |
| Total ordered and oriented | 47,477                                          | 725,0197,380             |
| Ratio (%)                  | 72.02                                           | 97.28                    |

246

247

248 **Supplementary Table 6.** Summary of BioNano data

| BioNano high-quality data       |              |
|---------------------------------|--------------|
| Filtered                        | 100 kb       |
| Enzyme                          | <i>BspQI</i> |
| N mols                          | 3,571,570    |
| Total length (> 100 kb, ~ 97×)  | 779 Gb       |
| Average length (> 100 kb)       | 218 kb       |
| Total length (> 150 kb, ~75.8×) | 607 Gb       |
| Average length (> 150 kb)       | 280 kb       |
| Mol N50 (kb)                    | 239.8        |
| Lab (/100kb)                    | 11.0         |

249 The data were generated using the enzyme *BspQI* on the BioNano Irys system. The filtered high quality data  
 250 represent an average coverage of 97× of the estimated Weining genome size (7.86 Gb).

251

252 **Supplementary Table 7.** Comparison of the sizes of assembled chromosomes of Weining rye and five other Triticeae species<sup>1</sup>

|              | <b>Sc</b>                 | <b>Tu</b> | <b>Aet</b> | <b>Hv</b> | <b>WEWA</b> | <b>WEWB</b> | <b>TaA</b> | <b>TaB</b> | <b>TaD</b> |
|--------------|---------------------------|-----------|------------|-----------|-------------|-------------|------------|------------|------------|
| Chromosome 1 | 0.94097 (1R) <sup>2</sup> | 0.58      | 0.50       | 0.56      | 0.59        | 0.69        | 0.59       | 0.69       | 0.50       |
| Chromosome 2 | 1.15054 (2R)              | 0.75      | 0.65       | 0.77      | 0.78        | 0.80        | 0.78       | 0.80       | 0.65       |
| Chromosome 3 | 1.09484 (3R)              | 0.75      | 0.63       | 0.70      | 0.75        | 0.84        | 0.75       | 0.83       | 0.62       |
| Chromosome 4 | 1.04378 (4R)              | 0.62      | 0.53       | 0.65      | 0.73        | 0.67        | 0.74       | 0.67       | 0.51       |
| Chromosome 5 | 0.99891 (5R)              | 0.66      | 0.58       | 0.67      | 0.70        | 0.71        | 0.71       | 0.71       | 0.57       |
| Chromosome 6 | 1.03447 (6R)              | 0.58      | 0.50       | 0.58      | 0.62        | 0.70        | 0.62       | 0.72       | 0.47       |
| Chromosome 7 | 1.00967 (7R)              | 0.72      | 0.64       | 0.66      | 0.73        | 0.76        | 0.74       | 0.75       | 0.64       |

253 <sup>1</sup>Sc, *Secale cereale* (Weining); Tu, *T. urartu* (G1812); Aet, *Ae. tauschii* (AL8/78); Hv, *Hordeum vulgare* (Morex); WEWA and WEWB, the A and B subgenomes of wild emmer wheat (*T.*  
254 *turgidum* ssp. *dicoccoides*, Zavitan); TaA, TaB and TaD, the A, B and D subgenomes of common wheat (*T. aestivum*, Chinese Spring).

255 <sup>2</sup>For simplicity, only the chromosome sizes of Sc (1R to 7R) are shown with five digits after decimal.

256 **Supplementary Table 8.** Assessing genome assembly using WGS Hiseq X Ten reads

| <b>Item</b>          | <b>Statistics</b>      |
|----------------------|------------------------|
| Total reads          | 2,775,853,179          |
| Mapped reads         | 2,769,537,530 (99.77%) |
| Paired in sequencing | 2,759,875,804          |
| Properly paired      | 2,671,730,270 (96.81%) |

257

258 **Supplementary Table 9.** Estimation of nucleotide accuracy in Weining genome  
259 assembly and the heterozygosity rate of Weining rye

| <b>Nucleotide accuracy of Weining genome assembly</b>                  |           |
|------------------------------------------------------------------------|-----------|
| Number of homozygous SNPs                                              | 242,455   |
| Number of homozygous InDels                                            | 218,570   |
| Estimated accuracy (versus the assembled genome size 7,737,590,180 bp) | 99.99404% |

260

| <b>Heterozygosity of Weining rye</b>                                         |            |
|------------------------------------------------------------------------------|------------|
| Number of heterozygous SNPs                                                  | 19,215,912 |
| Number of heterozygous InDels                                                | 1,530,913  |
| Estimated heterozygosity (versus the assembled genome size 7,737,590,180 bp) | 0.26%      |

261

262

263 **Supplementary Table 10.** Assessment of completeness of the HC gene models of  
264 Weining genome assembly using BUSCO dataset (1,440 genes)

---

| <b>Item</b>                             | <b>Number</b>                                      |
|-----------------------------------------|----------------------------------------------------|
| Number of full length BUSCO genes found | 1,370 (1,024 single copy plus 346 duplicated copy) |
| Number of fragmented BUSCO gene found   | 23                                                 |
| Total number of BUSCO genes found       | 1,393                                              |
| Percentage of BUSCO genes identified    | 96.74%                                             |

---

265

266 **Supplementary Table 11.** Characteristics of the Hiseq transcriptomes sequenced in this study

| Target gene                                        | Genotype | Tissue | Treatment/stage                    | Biological repeat | Sample ID | Clean read <sup>1</sup> | Mapping ratio (%) <sup>1</sup> |
|----------------------------------------------------|----------|--------|------------------------------------|-------------------|-----------|-------------------------|--------------------------------|
| Genes acting in vegetative and reproductive organs | Weining  | Root   | Normal condition                   | 4                 | R3-root   | 22241342                | 72.35                          |
|                                                    |          | Stem   | Normal condition                   | 4                 | R3-stem   | 23786069                | 82.93                          |
|                                                    |          | Leaf   | Normal condition                   | 4                 | R3-leaf   | 23171266                | 77.40                          |
|                                                    |          | Spike  | Normal condition                   | 4                 | R3-spiko  | 23124603                | 84.30                          |
|                                                    |          | Seed   | 10 days after anthesis             | 4                 | 10d       | 29351768                | 86.35                          |
|                                                    |          | Seed   | 20 days after anthesis             | 4                 | 20d       | 29335815                | 81.61                          |
|                                                    |          | Seed   | 30 days after anthesis             | 4                 | 30d       | 27728075                | 81.28                          |
|                                                    |          | Seed   | 40 days after anthesis             | 4                 | 40d       | 22052264                | 84.00                          |
| Genes acting in cold response                      | Weining  | Root   | No freezing (CK)                   | 1                 | R3-0h-G   | 26102733                | 84.72                          |
|                                                    |          | Root   | 1 h after freezing (at -10 °C)     | 1                 | R3-1h-G   | 24864187                | 84.49                          |
|                                                    |          | Root   | 4 h after freezing (at -10 °C)     | 1                 | R3-4h-G   | 21813051                | 81.95                          |
|                                                    |          | Root   | 8 h after freezing (at -10 °C)     | 1                 | R3-8h-G   | 22765797                | 82.15                          |
|                                                    |          | Leaf   | No freezing (CK)                   | 1                 | R3-0h-Y   | 26518627                | 84.67                          |
|                                                    |          | Leaf   | 1 hours after freezing (at -10 °C) | 1                 | R3-1h-Y   | 23684601                | 83.72                          |
|                                                    |          | Leaf   | 4 hours after freezing (at -10 °C) | 1                 | R3-4h-Y   | 26221665                | 83.95                          |
|                                                    |          | Leaf   | 8 hours after freezing (at -10 °C) | 1                 | R3-8h-Y   | 26490091                | 83.69                          |
| Genes acting in drought response                   | Weining  | Root   | 3 hours after drought              | 1                 | R3-3h-G   | 23386435                | 81.92                          |
|                                                    |          | Root   | 6 hours after drought              | 1                 | R3-6h-G   | 25290369                | 80.84                          |
|                                                    |          | Root   | 12 hours after drought             | 1                 | R3-12h-G  | 31347004                | 80.78                          |
|                                                    |          | Leaf   | 3 hours after drought              | 1                 | R3-3h-Y   | 23737660                | 83.33                          |
|                                                    |          | Leaf   | 6 hours after drought              | 1                 | R3-6h-Y   | 21501245                | 81.76                          |
|                                                    |          | Leaf   | 12 hours after drought             | 1                 | R3-12h-Y  | 27472050                | 84.09                          |
| Genes related to heading date determination        | Weining  | Leaf   | 4 days after sowing                | 3                 | WN4       | 28925265                | 87.45                          |
|                                                    |          | Leaf   | 7 days after sowing                | 3                 | WN7       | 27322030                | 87.63                          |
|                                                    |          | Leaf   | 10 days after sowing               | 3                 | WN10      | 28834831                | 87.47                          |
|                                                    | Jingzhou | Leaf   | 4 days after sowing                | 3                 | JZ4       | 27895940                | 83.69                          |
|                                                    |          | Leaf   | 7 days after sowing                | 3                 | JZ7       | 28516674                | 83.53                          |
|                                                    |          | Leaf   | 10 days after sowing               | 3                 | JZ10      | 30556639                | 83.61                          |

267 <sup>1</sup>Each of the values shaded in green or brown is the mean of four or three biological repeats.



268 **Supplementary Table 12.** Features of the PacBio transcriptomes sequenced in this study

| Target gene                                        | Genotype | Tissue | Treatment/stage        | Biological repeat | Sample ID    | Bam file size (Gb) | Number of circular consensus reads |
|----------------------------------------------------|----------|--------|------------------------|-------------------|--------------|--------------------|------------------------------------|
| Genes acting in vegetative and reproductive organs | Weining  | Root   | Normal condition       | 4                 | Mixed organs | 29.0               | 573,461                            |
|                                                    |          | Stem   | Normal condition       | 4                 |              |                    |                                    |
|                                                    |          | Leaf   | Normal condition       | 4                 |              |                    |                                    |
|                                                    |          | Spike  | Normal condition       | 4                 |              |                    |                                    |
|                                                    |          | Grain  | 10 days after anthesis | 4                 | Mixed grains | 31.0               | 296,749                            |
|                                                    |          | Grain  | 20 days after anthesis | 4                 |              |                    |                                    |
|                                                    |          | Grain  | 30 days after anthesis | 4                 |              |                    |                                    |
|                                                    |          | Grain  | 40 days after anthesis | 4                 |              |                    |                                    |

269

270

271 **Supplementary Table 13.** Statistics of gene features of 10 grass genomes/subgenomes<sup>1</sup>

|                          | <b>Sc</b> | <b>Tu</b> | <b>Aet</b> | <b>Hv</b> | <b>TaA</b> | <b>TaB</b> | <b>TaD</b> | <b>Bd</b> | <b>Os</b> | <b>Sb</b> | <b>Zm</b> |
|--------------------------|-----------|-----------|------------|-----------|------------|------------|------------|-----------|-----------|-----------|-----------|
| HC gene Number           | 45,596    | 41,493    | 39,635     | 39,731    | 35,345     | 35,643     | 34,212     | 34,310    | 39,054    | 34,118    | 39,591    |
| Gene length Mean         | 4,908.01  | 3,331.61  | 4,975.37   | 6,011.01  | 3,473.55   | 3,604.24   | 3,482.85   | 3,373.19  | 2,854.37  | 3,713.95  | 4,162.53  |
| Gene length Median       | 2,774     | 2,346     | 2,734      | 2,259     | 2,374      | 2,436      | 2,428      | 2,617     | 2,188     | 2,824     | 2,556     |
| Transcript Number        | 84,179    | 61,776    | 258,917    | 219,060   | 43,698     | 44,260     | 42,828     | 52,972    | 48,894    | 47,110    | 131,585   |
| Transcript length Mean   | 1,670.71  | 1,554.37  | 1,812.13   | 1,845.88  | 1,218.55   | 1,259.28   | 1,259.99   | 2,185.49  | 1,552.74  | 2,211.95  | 2,614.84  |
| Transcript length Median | 1,466     | 1,348     | 1,522      | 1,552     | 1,041      | 1,083      | 1,083      | 1,793     | 1,413     | 1,766     | 2,151     |
| CDS length Mean          | 1,221.99  | 1,012.26  | 1,020.68   | 1,058.34  | 1,218.55   | 1,259.28   | 1,259.99   | 1,260.06  | 1,079.99  | 1,228.18  | 1,446.86  |
| CDS length Median        | 1,053     | 774       | 798        | 840       | 1,041      | 1,083      | 1,083      | 1,035     | 888       | 1,014     | 1,041     |
| Exon number Mean         | 4.89      | 5.64      | 6.28       | 6.58      | 4.47       | 4.45       | 4.50       | 5.42      | 4.89      | 5.12      | 9.20      |
| Exon number Median       | 3         | 4         | 5          | 5         | 3          | 3          | 3          | 3         | 3         | 3         | 7         |
| Exon length Mean         | 341.78    | 275.78    | 288.57     | 280.46    | 272.43     | 283.09     | 280.12     | 403.58    | 317.23    | 431.66    | 284.09    |
| Exon length Median       | 167       | 152       | 140        | 137       | 142        | 145        | 144        | 156       | 159       | 161       | 141       |
| Intron length Mean       | 812.35    | 459.39    | 573.54     | 647.69    | 503.10     | 527.89     | 484.38     | 401.11    | 396.08    | 468.87    | 581.85    |
| Intron length Median     | 134       | 136       | 127        | 132       | 135        | 135        | 134        | 141       | 160       | 143       | 131       |

272 <sup>1</sup>Sc, *Secale cereale* (Weining); Tu, *T. urartu* (G1812); Aet, *Ae. tauschii* (AL8/78); Hv, *Hordeum vulgare* (Morex); TaA, TaB and TaD, the A, B and D subgenomes of common wheat (*T. aestivum*,  
273 Chinese Spring); Bd, *B. distachyon* (Bd21); Os, *O. sativa* ssp. *japonica* (Nipponbare); Sb, *Sorghum bicolor* (BTx623); Zm, *Zea mays* (B73).

274

275 **Supplementary Table 14.** Statistics of TE annotation in Weining genome assembly

| Class           | Superfamily              | Abbr. | Percentage (%) |                               | Number  |           | Family number | Total length (Mb) |
|-----------------|--------------------------|-------|----------------|-------------------------------|---------|-----------|---------------|-------------------|
|                 |                          |       | TEs            | Assembled genome <sup>a</sup> | Intact  | Truncated |               |                   |
| <b>Class I</b>  | <b>LTR</b>               |       |                |                               |         |           |               |                   |
|                 | <i>Gypsy</i>             | RLG   | 60.79          | 54.90                         | 177,152 | 1,027,641 | 63            | 4,249.9           |
|                 | <i>Copia</i>             | RLC   | 16.95          | 15.30                         | 72,941  | 237,069   | 40            | 1,184.6           |
|                 | Unclassified             | RLX   | 6.75           | 6.09                          | 23,401  | 139,723   | 27            | 471.6             |
|                 | <b>Non-LTR</b>           |       |                |                               |         |           |               |                   |
|                 | <i>LINE</i>              | RIX   | 1.28           | 1.16                          | 11,502  | 84,044    | 57            | 89.6              |
|                 | <i>SINE</i>              | RSX   | 0.005          | 0.0039                        | 945     | 1,307     | 3             | 0.3               |
| <b>Class II</b> | <b>DNA TE</b>            |       |                |                               |         |           |               |                   |
|                 | <i>CACTA</i>             | DTC   | 11.68          | 10.55                         | 19,072  | 405,085   | 50            | 816.5             |
|                 | <i>Mutator</i>           | DTM   | 0.43           | 0.39                          | 15,320  | 46,189    | 43            | 29.9              |
|                 | <i>Unclassified TIRs</i> | DTX   | 0.27           | 0.25                          | 34,031  | 29,209    | 67            | 19.1              |
|                 | <i>PIF/Harbinger</i>     | DTH   | 0.24           | 0.22                          | 14,012  | 22,391    | 17            | 17.1              |
|                 | <i>Tc1/Mariner</i>       | DTT   | 0.20           | 0.18                          | 70,803  | 24,854    | 40            | 13.9              |
|                 | Unclassified             | DXX   | 0.03           | 0.03                          | 1,218   | 3,940     | 6             | 2.2               |
|                 | hAT                      | DTA   | 0.19           | 0.17                          | 113     | 4,757     | 3             | 13.4              |
|                 | <b>Helitron</b>          | DHH   | 0.01           | 0.0078                        | 25      | 875       | 1             | 0.6               |
| <b>Others</b>   |                          | XXX   | 1.17           | 1.06                          | 69,806  | 134,516   | 120           | 81.9              |
| <b>Total</b>    |                          |       | 100.00         | 90.31                         | 510,341 | 2,161,600 | 537           | 6,990.6           |

276 <sup>a</sup>Calculated based on the assembled genome size (7.74 Gb).

**Supplementary Table 15.** Syntenic chromosomal segments between Weining rye and rice

| Rye (Weining) |            |          | Rice (Nipponbare) |            |          | Syntenic gene pairs |
|---------------|------------|----------|-------------------|------------|----------|---------------------|
| Chr.          | Start (Mb) | End (Mb) | Chr.              | Start (Mb) | End (Mb) |                     |
| 1R            | 69.60      | 210.19   | Chr5              | 1.46       | 5.30     | 216                 |
| 1R            | 211.19     | 599.90   | Chr10             | 15.61      | 23.20    | 498                 |
| 1R            | 600.23     | 940.97   | Chr5              | 17.63      | 29.79    | 595                 |
| 2R            | 11.40      | 25.03    | Chr4              | 8.31       | 8.95     | 18                  |
| 2R            | 25.03      | 600.32   | Chr7              | 28.08      | 0.11     | 748                 |
| 2R            | 600.32     | 1150.54  | Chr4              | 18.17      | 34.83    | 780                 |
| 3R            | 44.00      | 1094.84  | Chr1              | 0.02       | 40.65    | 1852                |
| 4R            | 0.17       | 91.15    | Chr3              | 23.54      | 29.29    | 401                 |
| 4R            | 91.15      | 514.00   | Chr11             | 0.58       | 9.20     | 239                 |
| 4R            | 514.00     | 534.05   | Chr3              | 11.98      | 12.50    | 38                  |
| 4R            | 536.08     | 616.15   | Chr8              | 24.40      | 26.55    | 114                 |
| 4R            | 616.15     | 931.18   | Chr6              | 0.25       | 11.88    | 483                 |
| 4R            | 931.18     | 1043.78  | Chr2              | 0.01       | 0.18     | 18                  |
| 5R            | 8.43       | 390.29   | Chr12             | 0.00       | 26.69    | 463                 |
| 5R            | 391.56     | 743.67   | Chr9              | 0.29       | 22.52    | 830                 |
| 5R            | 745.39     | 998.91   | Chr3              | 0.17       | 25.25    | 496                 |
| 6R            | 3.45       | 781.95   | Chr2              | 1.21       | 35.42    | 1310                |
| 6R            | 781.95     | 911.06   | Chr1              | 41.25      | 43.13    | 99                  |
| 6R            | 911.06     | 1034.47  | Chr6              | 26.39      | 31.02    | 65                  |
| 7R            | 7.00       | 346.31   | Chr3              | 2.39       | 11.96    | 958                 |
| 7R            | 346.31     | 644.30   | Chr8              | 0.10       | 28.13    | 321                 |
| 7R            | 644.30     | 976.50   | Chr6              | 13.11      | 29.34    | 368                 |
| 7R            | 976.50     | 1009.67  | Chr4              | 0.12       | 5.73     | 39                  |

**Supplementary Table 16.** Syntenic chromosomal segments between Weining rye and the three subgenomes of Chinese Spring wheat

| Rye (Weining) |            |          | Chinese Spring A subgenome |            |          |                     | Chinese Spring B subgenome |            |          |                     | Chinese Spring D subgenome |            |          |                     |
|---------------|------------|----------|----------------------------|------------|----------|---------------------|----------------------------|------------|----------|---------------------|----------------------------|------------|----------|---------------------|
| Chr.          | Start (Mb) | End (Mb) | Chr.                       | Start (Mb) | End (Mb) | Syntenic gene pairs | Chr.                       | Start (Mb) | End (Mb) | Syntenic gene pairs | Chr.                       | Start (Mb) | End (Mb) | Syntenic gene pairs |
| 1R            | 9.99       | 939.73   | 1A                         | 4          | 589.63   | 3140                | 1B                         | 4.97       | 686.85   | 3021                | 1D                         | 3.12       | 491.63   | 3066                |
| 2R            | 10.65      | 1136.49  | 2A                         | 24.28      | 780.78   | 3450                | 2B                         | 36.85      | 801.22   | 3341                | 2D                         | 22.45      | 650.78   | 3503                |
| 3R            | 6.35       | 1087.62  | 3A                         | 0.02       | 683.36   | 3025                | 3B                         | 3.31       | 750.86   | 3182                | 3D                         | 0.7        | 560.36   | 3351                |
| 4R            | 0.17       | 534.05   | 4A                         | 599.9      | 174.16   | 1695                | 4B                         | 0.23       | 380.65   | 1478                | 4D                         | 0.41       | 304.69   | 1431                |
| 4R            | 536.08     | 962.62   | 7A                         | 0          | 258.37   | 1445                | 7B                         | 2.1        | 337.64   | 1333                | 7D                         | 1.02       | 241.1    | 1315                |
| 4R            | 967.31     | 1041.84  | 6A                         | 0.63       | 35.26    | 299                 | 6B                         | 1.41       | 64.45    | 313                 | 6D                         | 1.59       | 31.85    | 385                 |
| 5R            | 2.69       | 912.63   | 5A                         | 7.51       | 650.83   | 3400                | 5B                         | 9.29       | 646.48   | 3205                | 5D                         | 9.28       | 528.73   | 3154                |
| 5R            | 918.92     | 985.14   | 5A                         | 663.19     | 709.53   | 452                 | 4B                         | 617.28     | 673.53   | 413                 | 4D                         | 480.8      | 509.48   | 514                 |
| 6R            | 6.64       | 786.21   | 6A                         | 37.42      | 613.63   | 1924                | 6B                         | 69.71      | 712.35   | 2039                | 6D                         | 36.58      | 467.2    | 2107                |
| 6R            | 787.26     | 912.32   | 3A                         | 698.35     | 749.85   | 432                 | 3B                         | 751.75     | 820.06   | 466                 | 3D                         | 564.14     | 613.6    | 458                 |
| 6R            | 914.25     | 1022.81  | 7A                         | 686.94     | 733.51   | 399                 | 7B                         | 672.76     | 735.31   | 327                 | 7D                         | 594.15     | 631.43   | 325                 |
| 7R            | 5.85       | 64.22    | 4A                         | 603.67     | 640      | 313                 | 5B                         | 670.93     | 710.24   | 255                 | 5D                         | 533.2      | 561.93   | 352                 |
| 7R            | 68.19      | 346.31   | 4A                         | 4          | 173.93   | 1013                | 4B                         | 380.72     | 607.44   | 1006                | 4D                         | 305.06     | 479.97   | 1134                |
| 7R            | 347.14     | 962.48   | 7A                         | 254.88     | 676.07   | 1439                | 7B                         | 216.82     | 654.92   | 1581                | 7D                         | 241.18     | 585.56   | 1405                |
| 7R            | 970.35     | 1008.4   | 2A                         | 2.37       | 20.86    | 222                 | 2B                         | 1.71       | 49.91    | 252                 | 2D                         | 2.22       | 18.75    | 330                 |

282 **Supplementary Table 17.** Classification by MCScanX program of the HC genes in Weining rye and six other grass species<sup>1</sup>

| Category             | Sc     | Tu     | Aet    | Hv     | TaA    | TaB    | TaD    | Bd     | Os     |
|----------------------|--------|--------|--------|--------|--------|--------|--------|--------|--------|
| Singleton            | 4,217  | 9,555  | 4,514  | 4,502  | 4,266  | 3,759  | 3,816  | 8,835  | 10,609 |
| Dispersed duplicated | 23,753 | 20,007 | 23,871 | 23,178 | 18,376 | 18,603 | 17,926 | 15,518 | 15,190 |
| Proximal duplicated  | 6,659  | 3,402  | 3,223  | 4,172  | 2,752  | 3,508  | 2,886  | 2,064  | 2,934  |
| Tandem duplicated    | 7,077  | 4,581  | 4,132  | 3,767  | 5,858  | 6,553  | 6,165  | 3,097  | 3,982  |
| Segmental duplicated | 1,866  | 505    | 3,035  | 1,945  | 4,023  | 3,138  | 3,368  | 4,795  | 6,137  |
| Total                | 43,572 | 38,050 | 38,775 | 37,564 | 35,275 | 35,561 | 34,161 | 34,302 | 38,852 |

283 <sup>1</sup>Sc, *Secale cereale* (Weining); Tu, *T. urartu* (G1812); Aet, *Ae. tauschii* (AL8/78); Hv, *Hordeum vulgare* (Morex); TaA, TaB and TaD, the A, B and D subgenomes of common wheat (*T. aestivum*,  
284 Chinese Spring); Bd, *B. distachyon* (Bd21); Os, *O. sativa* ssp. *japonica* (Nipponbare).  
285

**Supplementary Table 18.** Comparison of starch biosynthesis related genes in Weining rye and Chinese Spring wheat

| Gene <sup>1</sup> | Protein                                      | Gene ID in Weining rye                                                     | Chromosomal location in Weining rye | Type of duplication   | Chromosome location in common wheat |
|-------------------|----------------------------------------------|----------------------------------------------------------------------------|-------------------------------------|-----------------------|-------------------------------------|
| <i>ScAGP-L2-P</i> | ADP glucose pyrophosphorylase-L2-plastidic   | <i>ScWN5R01G581600</i><br><i>ScWN5R01G582200</i>                           | 5RL, 5RL                            | Proximally duplicated | 5AL 5BL 5DL                         |
| <i>ScAGP-S2-P</i> | ADP glucose pyrophosphorylase-S2-plastidic   | <i>ScWN5R01G184700</i>                                                     | 5RL                                 |                       | 5BL 5DL <sup>2</sup>                |
| <i>ScAGP-L1-C</i> | ADP glucose pyrophosphorylase-L1-cytoplasmic | <i>ScWN1R01G556700</i>                                                     | 1RL                                 |                       | 1AS 1BS 1DS                         |
| <i>ScAGP-S1-C</i> | ADP glucose pyrophosphorylase-S1-cytoplasmic | <i>ScWN7R01G268800</i>                                                     | 7RS                                 |                       | 7AS 7BS 7DS                         |
| <i>ScGBSSI</i>    | Granule bound starch synthase I              | <i>ScWN4R01G463600</i>                                                     | 4RL                                 |                       | 7AS 4AL 7DS                         |
| <i>ScGBSSII</i>   | Granule bound starch synthase II             | <i>ScWN2R01G422600</i>                                                     | 2RL                                 |                       | 2AL 2BL 2DL                         |
| <i>ScSSI</i>      | Starch synthase I                            | <i>ScWN4R01G394300</i>                                                     | 4RL                                 |                       | 7AS 7BS 7DS                         |
| <i>ScSSIIa</i>    | Starch synthase IIa                          | <i>ScWN4R01G311700</i>                                                     | 4RL                                 |                       | 7AS 7BS 7DS                         |
| <i>ScSSIIb</i>    | Starch synthase IIb                          | <i>ScWN6R01G257000</i>                                                     | 6RL                                 |                       | 6AL 6BL 6DL                         |
| <i>ScSSIIc</i>    | Starch synthase IIc                          | <i>ScWN1R01G185100</i><br><i>ScWN1R01G330400</i>                           | 1RS                                 |                       | 1AL 1BL 1DL                         |
| <i>ScSSIIIa</i>   | Starch synthase IIIa                         | <i>ScWN1R01G500200</i><br><i>ScWN4R01G199100</i>                           | 1RL, 1RL, 4RL                       | Dispersed duplicated  | 1AS 1BS 1DS                         |
| <i>ScSSIIIb</i>   | Starch synthase IIIb                         | <i>ScWN2R01G517800</i><br><i>ScWN1R01G467000</i>                           | 2RL                                 |                       | 2AL 2BL 2DL                         |
| <i>ScSSIV</i>     | Starch synthase IV                           | <i>ScWN1R01G486700</i><br><i>ScWN6R01G583300</i><br><i>ScWN6R01G584400</i> | 1RL                                 | Transposed duplicated | 1AL 1BL 1DL                         |
| <i>ScSBEI</i>     | Starch branching enzyme I                    | <i>ScWN6R01G583300</i><br><i>ScWN6R01G584400</i>                           | 6RL                                 | Proximally duplicated | 7AL 7BL 7DL                         |
| <i>ScSBEIIa</i>   | Starch branching enzyme IIa                  | <i>ScWN2R01G323200</i>                                                     | 2RL                                 |                       | 2AL 2BL 2DL                         |
| <i>ScSBEIIb</i>   | Starch branching enzyme IIb                  | <i>ScWN2R01G342700</i>                                                     | 2RL                                 |                       | 2AL 2BL 2DL                         |
| <i>ScSBEIII</i>   | Starch branching enzyme III                  | <i>ScWN7R01G337200</i>                                                     | 7RL                                 |                       | 7AL 7BL 7DL                         |
| <i>ScISA1</i>     | Isoamylase I                                 | <i>ScWN4R01G237900</i>                                                     | 4RL                                 |                       | 7AS 7BS 7DS                         |
| <i>ScISA2</i>     | Isoamylase II                                | <i>ScWN1R01G341700</i>                                                     | 1RL                                 |                       | 1AL 1BL 1DL                         |
| <i>ScISA3</i>     | Isoamylase III                               | <i>ScWN5R01G272000</i>                                                     | 5RL                                 |                       | 5AL 5BL 5DL                         |
| <i>ScPUL</i>      | Pullulanase                                  | <i>ScWN4R01G378700</i>                                                     | 4RL                                 |                       | 7AS 7BS 7DS                         |
| <i>ScPHO1</i>     | Plastid alpha-1,4-glucan phosphorylase I     | <i>ScWN5R01G446600</i>                                                     | 5RL                                 |                       | 5AL 5BL 5DL                         |

|                  |                                           |                                                       |               |                       |                      |
|------------------|-------------------------------------------|-------------------------------------------------------|---------------|-----------------------|----------------------|
| <i>ScPHO2</i>    | Plastid alpha-1,4-glucan phosphorylase II | ScWN3R01G454000<br>ScWN3R01G454100                    | 3RL           | Tandemly duplicated   | 3AL 3BL 3DL          |
| <i>ScDPE1</i>    | Disproportionating enzyme                 | ScWN2R01G161500<br>ScWN2R01G159200                    | 2RS           | Transposed duplicated | 2AS 2BS 2DS          |
| <i>ScGPT1</i>    | Glucose-6-phosphate translocator          | ScWN7R01G269800                                       | 7RS           |                       | 7AS 7BS 7DS          |
| <i>ScSuSy1</i>   | Sucrose synthase 1                        | ScWN5R01G436200<br>ScWN4R01G349100                    | 4RL, 5RL      | Transposed duplicated | 7AS 7BS 7DS          |
| <i>ScSuSy2</i>   | Sucrose synthase 2                        | ScWN2R01G169900<br>ScWN2R01G524700<br>ScWN4R01G484200 | 2RS, 2RL, 4RL | Transposed duplicated | 2AS 2BS 2DS          |
| <i>ScUGPase1</i> | UDP-glucose pyrophosphorylase             | ScWN5R01G327700<br>ScWN5R01G396700                    | 5RL, 5RL      | Transposed duplicated | 5AL 5BL 5DL          |
| <i>ScUGPase2</i> | UDP-glucose pyrophosphorylase             | ScWN4R01G563300                                       | 4RL           |                       | 6AS <sup>2</sup>     |
| <i>ScSPSI</i>    | Sucrose-phosphate synthase                | ScWN4R01G096500                                       | 4RS           |                       | 4AL 4BS 4DS          |
| <i>ScSPSII</i>   | Sucrose-phosphate synthase                | ScWN3R01G021900                                       | 3RS           |                       | 3AS 3DS <sup>2</sup> |
| <i>ScSPSIII</i>  | Sucrose-phosphate synthase                | ScWN6R01G072300                                       | 6RS           |                       | 6AS 6BS 6DS          |
| <i>ScSPSIV</i>   | Sucrose-phosphate synthase                | ScWN6R01G544800                                       | 6RL           |                       | 7AL 7BL 7DL          |
| <i>ScSPSV</i>    | Sucrose-phosphate synthase                | ScWN3R01G512400                                       | 3RL           |                       | 3AL 3BL 3DL          |
| <i>ScSUT1</i>    | Sucrose transporter                       | ScWN7R01G119300                                       | 7RS           |                       | 4AS 4BL 4DL          |
| <i>ScSUT2</i>    | Sucrose transporter                       | ScWN5R01G020700                                       | 5RS           |                       | 5BS 5DS <sup>2</sup> |

287 <sup>1</sup>The genes highlighted in red was duplicated once or twice in Weining rye genome relative to the three subgenomes of Chinese Spring.

288 <sup>2</sup>Some of the starch biosynthesis related genes in Chinese Spring lacked one or two homoeologs. These missing homoeologs had been annotated as low confidence genes in the genome  
289 assembly of Chinese Spring (v1.0).

290



291 **Supplementary Table 19.** Summary of secalin genes annotated in Weining genome assembly

| Locus                      | Gene name                   | Gene ID                    | Open reading frame | Predicted molecular mass (kDa) <sup>1</sup> | Chromosome location | Start     | End       | Strand  | Supporting PacBio transcriptome reads |
|----------------------------|-----------------------------|----------------------------|--------------------|---------------------------------------------|---------------------|-----------|-----------|---------|---------------------------------------|
|                            | <i>40k gamma-secalin 1</i>  | -                          | Disrupted          | -                                           | 1R                  | 10191653  | 10192549  | +       | -                                     |
|                            | <i>40k gamma-secalin 2</i>  | -                          | Disrupted          | -                                           | 1R                  | 10224852  | 10225763  | +       | -                                     |
|                            | <i>40k gamma-secalin 3</i>  | -                          | Disrupted          | -                                           | 1R                  | 10243802  | 10244703  | +       | -                                     |
|                            | <i>40k gamma-secalin 4</i>  | -                          | Disrupted          | -                                           | 1R                  | 10246636  | 10247541  | +       | -                                     |
| <i>Sec-1</i>               | <i>40k gamma-secalin 5</i>  | ScWN1R01G011410            | Intact             | 34.15                                       | 1R                  | 10268543  | 10269448  | +       | 49                                    |
|                            | <i>40k gamma-secalin 6</i>  | ScWN1R01G011420            | Intact             | 34.19                                       | 1R                  | 10287264  | 10288169  | +       | 51                                    |
|                            | <i>40k gamma-secalin 7</i>  | -                          | Disrupted          | -                                           | 1R                  | 10292504  | 10293400  | +       | -                                     |
|                            | <i>40k gamma-secalin 8</i>  | ScWN1R01G011810            | Intact             | 34.16                                       | 1R                  | 10297739  | 10298644  | +       | 43                                    |
|                            | <i>40k gamma-secalin 9</i>  | ScWN1R01G011820            | Intact             | 34.12                                       | 1R                  | 10302986  | 10303891  | +       | 31                                    |
|                            | <i>Omega secalin 1</i>      | -                          | Disrupted          | -                                           | 1R                  | 22150165  | 22151237  | +       | -                                     |
|                            | <i>Omega secalin 2</i>      | ScWN1R01G031890            | Intact             | 41.19                                       | 1R                  | 22173362  | 22174435  | +       | 9                                     |
|                            | <i>Omega secalin 3</i>      | ScWN1R01G031900            | Intact             | 41.55                                       | 1R                  | 22164116  | 22165188  | +       | 42                                    |
|                            | <i>Sec-2</i>                | <i>75k gamma-secalin 1</i> | ScWN2R01G004010    | Intact                                      | 52.70               | 2R        | 2510282   | 2511677 | -                                     |
| <i>75k gamma-secalin 2</i> |                             | ScWN2R01G004020            | Intact             | 54.29                                       | 2R                  | 2519784   | 2521218   | -       | 98                                    |
| <i>75k gamma-secalin 3</i> |                             | ScWN2R01G004030            | Intact             | 53.64                                       | 2R                  | 2542224   | 2543640   | -       | 81                                    |
| <i>Sec-3</i>               | <i>Glu-1Ry</i>              | ScWN1R01G430800            | Intact             | 80.77                                       | 1R                  | 793164916 | 793167542 | +       | 68                                    |
|                            | <i>Glu-1Rx</i>              | ScWN1R01G431000            | Intact             | 81.48                                       | 1R                  | 793201484 | 793203161 | +       | 147                                   |
| <i>Sec-4</i>               | <i>40k gamma-secalin 10</i> | ScWN1R01G083810            | Intact             | 34.22                                       | 1R                  | 83209223  | 83210128  | +       | 176                                   |
|                            | <i>Omega secalin 4</i>      | ScWN1R01G085210            | Intact             | 55.39                                       | 1R                  | 83801733  | 83803163  | -       | 5                                     |

292 <sup>1</sup>The deduced amino acid sequences of the 13 active secalin genes are listed below.

293 >40k gamma-secalin 5

294 MKTFLILTLAMATTIATANMQVGPSPGVWPEQQPLPQPQQPVYQQPQQIFPQPQQTFFLEPQQTFFPQPQQTFFPHQPQQFPQAQQPEQPFPEPQQTFFPQPQLPFPQPQQPLPQPQQPQQPFPQPQQPFPQPQQQFPQP  
 295 QPQQSIPQQQLIQSSLQQMNPCKNFLQQCNPVSLVSSLVSLILPRSDCQVMQQCCQLAQIPQHLQCAAHSVAHSIIMQQQQQGGIQLRPLFQIVQQQSIIQQQPAQLEVIRSLVLKTLPTMCNVYVRPDCSNIRTPF  
 296 ASTVAGIGGQ

297 >40k gamma-secalin 6

298 MKTFLILTLAMATTIATANMQVGPSPGVWPEQQPLPQPQQPVYQQPQQIFPQPQQTFFLEPQQTFFPQPQQTFFPHQPQQFPQAQQPQQPFPQPQQTFFPQPQLPFPQPQQPLPQPQQPQQPFPQPQQPFPQPQQQFPQP

299 QQPQSQSIPQQQPLIQSSLQQMNPCKNFLQCCNPVSLVSSLVSLILPRSDCQVMQQCCQQLAQIPQHLQCDAIHSVAHSIIMQQQQQGGIQLRPLFQIVQGQSIHQQPAQLEVIRSLVLKTLPTMCNVYVRPDCSNIRTPF  
300 ASTVAGIGGQ

301 >40k gamma-secalin 8

302 MKTFLILTLAMATTIATANMQVGPSSGQVEWPQQPLPQPQPQVYQQPQIFPQPQQTFFLEPQQTFFPQPQQTFFPHQPQQFPQAQQPQQPFPQPQQTFFPQPQLPFPQPQPQPLPQPQPQPPFPQPQPQQTFFPQPQQFPQP  
303 QQPQSQSIPQQQPLIQSSLQQVNPCKNFLQCCNPVSLVSSLVSLILPRSDCQVMQQCCQQLAQITQHLQCAAHSVAHSIIMQQQQQGGIQLRPLFQIVQGQSIHQQPAQLEVIRSFVLKTLPTMCNVYVRPDCSNIRTPF  
304 ASTVAGIGGQ

305 >40k gamma-secalin 9

306 MKTFLILTLAMATTIATANMQVGPSSGQVEWPQQPLPQPQPQVYQQPQIFPQPQQTFFLEPQQTFFPQPQQTFFPHQPQQFPQAQQPQQPFPQPQQTFFPQPQLPFPQPQPQPLPQPQPQPPFPQPQPQQTFFPQPQQFPQP  
307 QQPQSQSIPQQQPLIQSSLQQVNPCKNFLQCCNPVSLVSSLVSLILPRSDCQVMQQCCQQLAQIPQHLQCAAHSVAHSIIMQQQQQGGIQLRPLFQIVQGQSIHQQPAQLEVIRSLVLKTLPTMCNVYVRPDCSNIRTPFA  
308 STVAGIGGQ

309 >40k gamma-secalin 10

310 MKTFLILTLAMATTIATANMQVGPSSGQVEWPQQPLPQPQPQVYQQPQIFPQPQQTFFLEPQQTFFPQPQQTFFPHQPQQFPQAQQPQQPFPQPQQTFFPQPQLPFPQPQPQPLPQPQPQPPFPQPQPQQTFFPQSQQPQPFPQTQQQFPQ  
311 PQQPQQSIPQQQPLIQSSLQQMNPCKNFLQCCNAVSLVSSIVSLILPRSDCQVMQQCCQQLAQIPQHLQCAAHSVHHSIIMQQQQQGGIQLRPLFQIVQGQSIHQQLAQLEVIRSLVLKTLPTMCNVYVRPDCSNIRTP  
312 FSSTIAGIGGQ

313 >Omega-secalin 2

314 MKTFLIFVLAMTMSIVTTARQLNPSEQKLQSPQPVPKEQSYLQQPYPSHQPFPTPQQYSPYQPHQPFPPQPQPTPIQPQQPFPQPQPQPFPQPQQQLPLQPQQPFPQPQQLIPQQPHQSFPQPQRQPQQQFPQPQQIIPQQTQQ  
315 SFPLQPQQPFPQPQRPFQAQQPEQIISQQPFPPLQPQQPFSQPQRFPFPQPGKILQQPQQPSPLQPQQPFSQPQRQPQTFFPQPQIIPQPQPFPPLQPQQPVPQQPQRPFQGPQPEIISQRQPFPPLQPQQSFSQPQEPFPQPQ  
316 QIIPQPQPFPPLQPQQPFLQQTQEQIISQQPQQPSPLQPQQPSQPQPQLPFPSPSNHLY

317 >Omega-secalin 3

318 MKTFLIFVLAMTMSIITARQLNPSEQELQSPQPVPKEQSYQQPYPSHQPFPTPQQYSPYQPPQFPQPQPQTPIQPQQPFPQPQPQPFPQPQQQLPLQPQQPFPQPQPPIPQPQQSFPQPQRPEQFPQPQQIIPQQTQQP  
319 FPLQPQQPFPQPQRPFQAQQPEQIISQQPFPPLQPQQPFSQPQPFPQPQPGIIPQPQPSPPLQPQQPFSQPQRQPFPQPQPQIIPQPQPFPPLQPQQPVPQQPQRPFQGPQPEIISQRQPFPPLQPQQPFSQPQPFPQPQPGQ  
320 IIPQPQPFPPLQPQQPFPQPQPEIISQQPQPFPPLQPQQPSQPQPQLPFPQPQPFPVVV

321 >Omega-secalin 4

322 MKTFLIFVLFAMAMSIATSARQLNPNNPQQLFSHHEQFPQNPYPSPQFPPTPQQQLPQSSQPFPQPQTQTPLQPQQPFPQPQPVPQPQQSFLQPEQFPFPQPEQPSQPQPEIIPQPQPQPSPLQPQQPFPQPQPFPFLLP  
323 KHIIQPQPQRFLPLPEHIIQPQPQQFSLQPQQPFLQPQQPFPQPQPQPVPVRPQQSSPQPQPFPPLQPQQPFPQPQPFPQPQPSPQPEIIPQPQPQPSPLQPQQSFPQPQPFPQPQPFPFLLPKHIIQPQPQRFLPL  
324 PEHIIQPQPQQFSLQPQQPFPQPQPFPQPQPQTTPPQPQPFPQHSQQQFPEPQPQPFPPLQPQQQFPQPQPFPQPQPFPQPQPFPQKAQQSQSIPQPQPQLSPFPQPQLLPQPQPFPPLQPQQPLPQKPEQIIAQ  
325 QPQQPLPQQPHQPQPYPQQPSRSSVTSIGGQ

326 >75k gamma-secalin 1

327 MKTLLMLAILAMATTIATANMQVNPSSGQVQCPCQQPFPQPQKSSPQPQPFPQSSQPFPQPQPSSPQLQPYQPFPFPQPQPYPQPQPFPFPQPQPYPQPQPFPQPQPQPVPQPQPQPVPQQPLQQFPQPQQS  
328 FPQPQPVPQPPLQQFPQPQPFPQPQPQPVPQQSQSFPQTQQPQPFPQPQPQLFPQPQLSSSQPQVTSQPQPFPQAQPQPQSCPQSQQPYPQEPQQLFPQSQPQPFPQPQPQPFPQPQPQTQSSIPQPQP  
329 FPQYQEPFPQVHQPPSPQPSQPSQLSLQQLNPCKNVLLQCCSPVALVSSLSKIFPQSECQVMQQCCQQLAQIPQQLQCAAHSVVHAIIMQEQREGVQILLPQSHKQHVGGALAQVQGHIPQQLSLEVVVRSVLV  
330 QNLPTMCNVYVRQCSTIQAPFASIVTGIVGH

331 >75k gamma-secalin 2

332 MKTLLMLAILAMATTIATANMQVNPSSGQVQCPCQQPFPQPQSSPQPQPFPQSSQPFPQPQPSSPQPQPYPQPFPFPQPQPYPQPQPFPFPQPQPYPQPQPFPQPQPQPVPQPQPQQFPQPQPQPVPQPQLQ  
333 QFPQPQPQSPFPQPQPVPQPPLQQFPQPQPFPQPQPQPVPQQSQPFPQTQQPQPFPQPQPQPQLFPQTQSSPQPQPQVTSQPQPFPQAQPQPQSSPQSQQPYPQEPQQLFPQSQPQPFPQPQPQPFPQPQPQTQ  
334 SIPQPQPFPQPQPFPQSQEPFPQVHQPPSPQPSQLSLQQLNPCKNVLLQCCSPVALVSSVRSKIFPQSECQVMQQCCQQLAQIPQQLQCAAHSVVHAIIMQEQREGVQILLPQSHQHVGGALAQVQGHIP  
335 QLSQLEVVRSVLVQNLPTMCNVYVRQCSTIQAPFASIVTGIVGH

336 >75k gamma-secalin 3  
337 MKTLLMLAILAMATTIATANMQVNPSGQVQCPCQQPFPQQSSPQQPFPQQSSPQQPYPQQPFPQQPYPQQPFPQQPFPQQPVPQQPQQFPQQPQPVPQQPLQ  
338 QFPQQPQQPFPQQPLQQFPQQPFPQQPFPQQPVPQQSSQFPQTQQPQQPFPQQPQQPQLFPQTQQSSPQQPQVTSQPQQPFPQAQPPQQSSPQSQQFYQEPQQLFPQSQQPFPQQPFPQQPFPQQPQTQQSIPFPQQ  
339 PFPQQPFPFPQSQEFPQVHQPPSPQQQPSIQLSLQQQLNPCKNVLLQQCSPVALVSSLRSKIFPQSECQVMQQCCQQLAQIPQQLQCAAHSVVHAIMQQEQREGVQILLPQSHQQHVGGGALAQVQGIHQPQQLSQL  
340 EVVRSVLVQLNPTMCNVYVPRQCSTIQAPFASIVTGIVGH

341 >Glu-1Ry  
342 MAKRLVLFATVVIALVALTAAEGEASGQLQCERELQESSLEACRQVVDQQLAGRLPWSTGLQMRCCQQLRDVSAKCRHVAVSQVARQYEQTTPPKGGSFYPTSETPLQQLQQGIFWGTSSQTVQGYYPSTSPQQGSYYP  
343 GQASPPQPGQGQQPGKWQEPGQWQQGYPTSLQQPGQGGQEHYPASQQHPRQGGQGHYPASLQQPGQGGQTRQPGQIQPGQGGQIEQAQQPEQEQQPGQGGQGYSTPPQPGQGGQPGQGGQGYPTSLQQPGQG  
344 QPGQRQQPGQGGQIGQGGQQPEQEQQPGQGGQGGYYPASLQEPGQGGQEHYPASQQPQGGQGGHYYPASPQQPGQGRQGHYPASLQHPGQGGQTEQPGQGGQPEEGQQPEQEQLGQGGQGGYPTSPQQPGQGGQPGQG  
345 QQGYYSTSLQQPGQGGQGHYPTSLQQPGQGGQPGQRQQLGQGGQPGQGGQPEQEQQPGQGGQGGYPTSPQQPGQGGQPGQGGQGGYYSTSLQQPGQGGQGHYPTSLQQPGQGGQPGQRQQPGQGGQIGQGGQPEQEQQPG  
346 QGQGGHYYPASLQQPGQGGQTEQPGQGGQLGQGGQPGQGGHPEQEQQPGQWQKGYPTSPQQPGQGGQPGQWQPGQGGQGGHCPSTRQPGQAQQPGQGGQIGQAQKPGQGGQGHYPTSLQHPGQLQSGQGGQSG  
347 QGHQPGQGGQSGQDQQGHDSCHVSAEQQATSPKVAKAQQPVAQLPAMCRMEAGDALASQ

348 >Glu-1Rx  
349 MAKRLVLFAAVVVALVALTVAEGEASGQLQCERELQERELEACRQIVDQQLRDTSPGCRPVAVSPGTGQQEQQTVVPLKGGSFYPTDETSPPQQLQERILWGIPTLLKRYYPSTSPHQGSYYPGQTSLQQPGQAQQPGQGGQ  
350 GQAQQPGHGQSGGQGGQPEKGGQGGYPTTPQPGQGGQPGQGGQPGYILTSSQPGQGGQPGQGGQPGYPTSSQQLGQGGQLGQGGQGGQPGQGGQPGYPTSPQPGQGGQPGQGGQPGQGGQGGQGGQGGQGGQPG  
351 QGQPGEGQGGYPTFPQPGQVQQPGQGGQPGQGGQPGYPTSPQPGQGGQPGQEQQPGQRQQPGQGGKPGYPTSPQSGGQGGYPTSPQPGQEQQPGQGGVQPGQGGQPGQGGQGGYPTSPQSGQAQQP  
352 GQWQQPGQGGQSGYPTSPQPGQGGQPGQGGQPGQGGQPGQGGQAGQGGQGGYPTSPQQLGQGGQPGQGGQPGQGGQPGYPTSPQPGQGGQGTGGQGGQGGQGGQGGQPGQGGQGGYPTSP  
353 QPGQGGQGGQGGQLEYYPTSPQPGQGGQPGYPTFPQLPGQLQQAQGGQGGYPTSPQPGQGGQKYYPTSPQPGQWQQPGQGGQGGYITSPQSGGQGGQPGQGGQPGQGGQGGYPTLGGQPGQWLQIGQGGQGGYPT  
354 TSPQQLGQGGQGGYLTSPQPGQKQPGQGGQSYDSPYHVS AEHQAAASLKVAKAQQLAQLPAMCRLEGGDALLASQ

**Supplementary Table 20.** Summary of GenBank accession numbers for the SSPs compared in Extended Data Fig. 6

| Type                                                       | SSP                         | NCBI accession number or gene id | Species                  |
|------------------------------------------------------------|-----------------------------|----------------------------------|--------------------------|
| HMW<br>glutenins/HMW-secalins/<br>D-hordein                | Ta HMW-GS Ax1               | X61009.1                         | <i>Triticum aestivum</i> |
|                                                            | Ta HMW-GS Ax2               | M22208.2                         | <i>Triticum aestivum</i> |
|                                                            | Ta HMW-GS Bx7               | BK006773.1                       | <i>Triticum aestivum</i> |
|                                                            | Ta HMW-GS Bx14              | AY367771.1                       | <i>Triticum aestivum</i> |
|                                                            | Ta HMW-GS By8               | JF736014.1                       | <i>Triticum aestivum</i> |
|                                                            | Ta HMW-GS By9               | X61026.1                         | <i>Triticum aestivum</i> |
|                                                            | Ta HMW-GS Dx2               | X03346.1                         | <i>Triticum aestivum</i> |
|                                                            | Ta HMW-GS Dy12              | BK006459.1                       | <i>Triticum aestivum</i> |
|                                                            | Aet HMW-GS-y                | AET1Gv20756900                   | <i>Aegilops tauschii</i> |
|                                                            | Aet HMW-GS-x                | AET1Gv20757200                   | <i>Aegilops tauschii</i> |
|                                                            | Sc HMW-SS 1Ry               | ScWN1R01G430800                  | <i>Secale cereale</i>    |
|                                                            | Sc HMW-SS 1Rx               | ScWN1R01G431000                  | <i>Secale cereale</i>    |
|                                                            | Hv D-hordein                | HORVU1Hr1G066650                 | <i>Hordeum vulgare</i>   |
|                                                            | Ta LMW-GS A2                | MH347495.1                       | <i>Triticum aestivum</i> |
|                                                            | Ta LMW-GS B2                | MH347496.1                       | <i>Triticum aestivum</i> |
|                                                            | Ta LMW-GS B3                | MH347497.1                       | <i>Triticum aestivum</i> |
|                                                            | Ta LMW-GS B4                | MH347498.1                       | <i>Triticum aestivum</i> |
|                                                            | Ta LMW-GS D1                | MH347499.1                       | <i>Triticum aestivum</i> |
|                                                            | Ta LMW-GS D2                | MH347500.1                       | <i>Triticum aestivum</i> |
| Ta LMW-GS D3                                               | MH347501.1                  | <i>Triticum aestivum</i>         |                          |
| Ta LMW-GS D6                                               | MH347502.1                  | <i>Triticum aestivum</i>         |                          |
| LMW<br>glutenins/B-hordeins                                | Ta LMW-GS D7                | MH347503.1                       | <i>Triticum aestivum</i> |
|                                                            | Ta LMW-GS D8                | MH347504.1                       | <i>Triticum aestivum</i> |
|                                                            | Aet LMW-GS 1                | AET1Gv20018600                   | <i>Aegilops tauschii</i> |
|                                                            | Aet LMW-GS 2                | AET1Gv20026700                   | <i>Aegilops tauschii</i> |
|                                                            | Aet LMW-GS 3                | AET1Gv20027600                   | <i>Aegilops tauschii</i> |
|                                                            | Aet LMW-GS 4                | AET1Gv20028600                   | <i>Aegilops tauschii</i> |
|                                                            | Hv B-hordein-5              | HORVU1Hr1G001120                 | <i>Hordeum vulgare</i>   |
|                                                            | Hv B-hordein-6              | HORVU1Hr1G001140                 | <i>Hordeum vulgare</i>   |
|                                                            | Hv B-hordein-7              | HORVU1Hr1G001350                 | <i>Hordeum vulgare</i>   |
|                                                            | Hv B-hordein-8              | HORVU1Hr1G001420                 | <i>Hordeum vulgare</i>   |
|                                                            | Ta $\gamma$ -gliadin A1     | MH347507.1                       | <i>Triticum aestivum</i> |
|                                                            | Ta $\gamma$ -gliadin A3     | MH347517.1                       | <i>Triticum aestivum</i> |
|                                                            | Ta $\gamma$ -gliadin A4     | MH347508.1                       | <i>Triticum aestivum</i> |
|                                                            | Ta $\gamma$ -gliadin B1     | MH347509.1                       | <i>Triticum aestivum</i> |
|                                                            | Ta $\gamma$ -gliadin B2     | MH347510.1                       | <i>Triticum aestivum</i> |
|                                                            | Ta $\gamma$ -gliadin B4     | MH347511.1                       | <i>Triticum aestivum</i> |
|                                                            | Ta $\gamma$ -gliadin B6     | MH347512.1                       | <i>Triticum aestivum</i> |
|                                                            | Ta $\gamma$ -gliadin D1     | MH347513.1                       | <i>Triticum aestivum</i> |
|                                                            | Ta $\gamma$ -gliadin D2     | MH347514.1                       | <i>Triticum aestivum</i> |
| Ta $\gamma$ -gliadin D3                                    | MH347515.1                  | <i>Triticum aestivum</i>         |                          |
| Ta $\gamma$ -gliadin D4                                    | MH347516.1                  | <i>Triticum aestivum</i>         |                          |
| $\gamma$ -gliadins/ $\gamma$ -secalins/ $\gamma$ -hordeins | Aet $\gamma$ -gliadin 1     | AET1Gv20016500                   | <i>Aegilops tauschii</i> |
|                                                            | Aet $\gamma$ -gliadin 2     | AET1Gv20016600                   | <i>Aegilops tauschii</i> |
|                                                            | Sc 40k $\gamma$ -secalin 5  | ScWN1R01G011410                  | <i>Secale cereale</i>    |
|                                                            | Sc 40k $\gamma$ -secalin 6  | ScWN1R01G011420                  | <i>Secale cereale</i>    |
|                                                            | Sc 40k $\gamma$ -secalin 8  | ScWN1R01G011810                  | <i>Secale cereale</i>    |
|                                                            | Sc 40k $\gamma$ -secalin 9  | ScWN1R01G011820                  | <i>Secale cereale</i>    |
|                                                            | Sc 40k $\gamma$ -secalin 10 | ScWN1R01G083810                  | <i>Secale cereale</i>    |
|                                                            | Sc 75k $\gamma$ -secalin 1  | ScWN2R01G004010                  | <i>Secale cereale</i>    |

|                                        |                            |                  |                          |
|----------------------------------------|----------------------------|------------------|--------------------------|
|                                        | Sc 75k $\gamma$ -secalin 2 | ScWN2R01G004020  | <i>Secale cereale</i>    |
|                                        | Sc 75k $\gamma$ -secalin 3 | ScWN2R01G004030  | <i>Secale cereale</i>    |
|                                        | Hv $\gamma$ -hordein 2     | HORVU1Hr1G000640 | <i>Hordeum vulgare</i>   |
|                                        | Hv $\gamma$ -hordein 3     | HORVU1Hr1G000680 | <i>Hordeum vulgare</i>   |
|                                        | Ta $\delta$ -gliadin B1    | MH347505.1       | <i>Triticum aestivum</i> |
|                                        | Ta $\delta$ -gliadin D1    | MH347506.1       | <i>Triticum aestivum</i> |
|                                        | Aet $\delta$ -gliadin 1    | AET1Gv20016100   | <i>Aegilops tauschii</i> |
|                                        | Ta $\omega$ -gliadin B3    | MH347522.1       | <i>Triticum aestivum</i> |
|                                        | Ta $\omega$ -gliadin B6    | MH347518.1       | <i>Triticum aestivum</i> |
|                                        | Ta $\omega$ -gliadin D1    | MH347519.1       | <i>Triticum aestivum</i> |
|                                        | Ta $\omega$ -gliadin D2    | MH347520.1       | <i>Triticum aestivum</i> |
| $\omega$ -gliadins/ $\omega$ -secalins | Ta $\omega$ -gliadin D3    | MH347521.1       | <i>Triticum aestivum</i> |
|                                        | Aet $\omega$ -gliadin 1    | AET1Gv20013100   | <i>Aegilops tauschii</i> |
|                                        | Sc $\omega$ -secalin 2     | ScWN1R01G031890  | <i>Secale cereale</i>    |
|                                        | Sc $\omega$ -secalin 3     | ScWN1R01G031900  | <i>Secale cereale</i>    |
|                                        | Sc $\omega$ -secalin 4     | ScWN1R01G085210  | <i>Secale cereale</i>    |
|                                        | Ta $\alpha$ -gliadin A1    | MH338193.1       | <i>Triticum aestivum</i> |
|                                        | Ta $\alpha$ -gliadin A2    | MH338194.1       | <i>Triticum aestivum</i> |
|                                        | Ta $\alpha$ -gliadin A4    | MH338195.1       | <i>Triticum aestivum</i> |
|                                        | Ta $\alpha$ -gliadin A5    | MH338196.1       | <i>Triticum aestivum</i> |
|                                        | Ta $\alpha$ -gliadin A6    | MH338197.1       | <i>Triticum aestivum</i> |
|                                        | Ta $\alpha$ -gliadin A8    | MH338198.1       | <i>Triticum aestivum</i> |
|                                        | Ta $\alpha$ -gliadin A9    | MH338199.1       | <i>Triticum aestivum</i> |
|                                        | Ta $\alpha$ -gliadin A10   | MH338200.1       | <i>Triticum aestivum</i> |
|                                        | Ta $\alpha$ -gliadin B3    | MH338182.1       | <i>Triticum aestivum</i> |
|                                        | Ta $\alpha$ -gliadin B7    | MH338183.1       | <i>Triticum aestivum</i> |
|                                        | Ta $\alpha$ -gliadin B8    | MH338184.1       | <i>Triticum aestivum</i> |
|                                        | Ta $\alpha$ -gliadin B9    | MH338185.1       | <i>Triticum aestivum</i> |
|                                        | Ta $\alpha$ -gliadin B11   | MH338186.1       | <i>Triticum aestivum</i> |
| $\alpha$ -gliadins                     | Ta $\alpha$ -gliadin B14   | MH338187.1       | <i>Triticum aestivum</i> |
|                                        | Ta $\alpha$ -gliadin B15   | MH338188.1       | <i>Triticum aestivum</i> |
|                                        | Ta $\alpha$ -gliadin B16   | MH338189.1       | <i>Triticum aestivum</i> |
|                                        | Ta $\alpha$ -gliadin B17   | MH338190.1       | <i>Triticum aestivum</i> |
|                                        | Ta $\alpha$ -gliadin B18   | MH338191.1       | <i>Triticum aestivum</i> |
|                                        | Ta $\alpha$ -gliadin B25   | MH338192.1       | <i>Triticum aestivum</i> |
|                                        | Ta $\alpha$ -gliadin D1    | MH338176.1       | <i>Triticum aestivum</i> |
|                                        | Ta $\alpha$ -gliadin D4    | MH338177.1       | <i>Triticum aestivum</i> |
|                                        | Ta $\alpha$ -gliadin D5    | MH338178.1       | <i>Triticum aestivum</i> |
|                                        | Ta $\alpha$ -gliadin D6    | MH338179.1       | <i>Triticum aestivum</i> |
|                                        | Ta $\alpha$ -gliadin D8    | MH338180.1       | <i>Triticum aestivum</i> |
|                                        | Ta $\alpha$ -gliadin D12   | MH338181.1       | <i>Triticum aestivum</i> |
|                                        | Aet $\alpha$ -gliadin 1    | AET6Gv20127000   | <i>Aegilops tauschii</i> |
|                                        | Aet $\alpha$ -gliadin 2    | AET6Gv20125400   | <i>Aegilops tauschii</i> |

**Supplementary Table 21.** Comparison of transcription factor genes annotated in Weining rye and other grass genomes<sup>1</sup>

| TF family   | Sc  | TaA           | TaB           | TaD           | DUWA          | DUWB          | WEWA          | WEWB          | AA            | DD            | Bd            | Hv            | Os            | Fold of increase in rye <sup>2</sup> |
|-------------|-----|---------------|---------------|---------------|---------------|---------------|---------------|---------------|---------------|---------------|---------------|---------------|---------------|--------------------------------------|
| HB-other    | 32  | 20            | 22            | 21            | 32            | 16            | 20            | 15            | 32            | 20            | 12            | 20            | 14            |                                      |
| MADS-M-type | 44  | 48            | 58            | 48            | 35            | 42            | 26            | 27            | 19            | 33            | 46            | 34            | 37            |                                      |
| C2H2        | 191 | 148<br>(1.29) | 148<br>(1.29) | 151<br>(1.26) | 121<br>(1.58) | 134<br>(1.43) | 62<br>(3.08)  | 70<br>(2.73)  | 113<br>(1.69) | 146<br>(1.31) | 115<br>(1.66) | 125<br>(1.53) | 121<br>(1.58) | 1.26 - 3.08                          |
| MYB         | 173 | 144<br>(1.20) | 138<br>(1.25) | 145<br>(1.19) | 129<br>(1.34) | 117<br>(1.48) | 120<br>(1.44) | 119<br>(1.45) | 125<br>(1.38) | 131<br>(1.32) | 122<br>(1.42) | 117<br>(1.48) | 117<br>(1.48) | 1.19-1.48                            |
| GRAS        | 67  | 62<br>(1.08)  | 55<br>(1.22)  | 63<br>(1.06)  | 58<br>(1.16)  | 52<br>(1.29)  | 55<br>(1.22)  | 57<br>(1.12)  | 43<br>(1.56)  | 55<br>(1.22)  | 63<br>(1.06)  | 62<br>(1.08)  | 60<br>(1.12)  | 1.06-1.56                            |
| B3          | 120 | 141           | 147           | 141           | 102           | 100           | 73            | 74            | 117           | 92            | 51            | 85            | 54            |                                      |
| C2C2-Dof    | 44  | 36<br>(1.22)  | 33<br>(1.33)  | 31<br>(1.42)  | 29<br>(1.52)  | 28<br>(1.57)  | 23<br>(1.91)  | 25<br>(1.76)  | 29<br>(1.52)  | 29<br>(1.52)  | 29<br>(1.52)  | 25<br>(1.76)  | 30<br>(1.47)  | 1.22-1.91                            |
| MADS-MIKC   | 47  | 40<br>(1.18)  | 41<br>(1.15)  | 44<br>(1.07)  | 41<br>(1.15)  | 38<br>(1.24)  | 31<br>(1.52)  | 28<br>(1.68)  | 39<br>(1.20)  | 36<br>(1.31)  | 33<br>(1.42)  | 33<br>(1.42)  | 35<br>(1.34)  | 1.07-1.68                            |
| HB-WOX      | 15  | 15            | 13            | 14            | 14            | 13            | 12            | 9             | 9             | 14            | 13            | 13            | 14            |                                      |
| AP2/ERF-AP2 | 27  | 20<br>(1.35)  | 20<br>(1.35)  | 21<br>(1.29)  | 17<br>(1.59)  | 18<br>(1.5)   | 19<br>(1.42)  | 19<br>(1.42)  | 16<br>(1.69)  | 23<br>(1.17)  | 23<br>(1.17)  | 14<br>(1.93)  | 14<br>(1.93)  | 1.17-1.93                            |
| LOB         | 42  | 31<br>(1.35)  | 29<br>(1.45)  | 29<br>(1.45)  | 26<br>(1.62)  | 28<br>(1.5)   | 26<br>(1.62)  | 26<br>(1.62)  | 27<br>(1.56)  | 29<br>(1.45)  | 28<br>(1.5)   | 32<br>(1.31)  | 36<br>(1.17)  | 1.17-1.62                            |
| PLATZ       | 13  | 16            | 14            | 16            | 15            | 13            | 10            | 12            | 14            | 13            | 14            | 9             | 15            |                                      |
| MYB-related | 102 | 76<br>(1.34)  | 75<br>(1.36)  | 78<br>(1.31)  | 66<br>(1.55)  | 64<br>(1.59)  | 70<br>(1.46)  | 73<br>(1.40)  | 79<br>(1.29)  | 77<br>(1.32)  | 57<br>(1.79)  | 90<br>(1.13)  | 64<br>(1.59)  | 1.13-1.79                            |
| C3H         | 73  | 52<br>(1.40)  | 50<br>(1.46)  | 49<br>(1.49)  | 45<br>(1.62)  | 43<br>(1.70)  | 41<br>(1.78)  | 46<br>(1.59)  | 51<br>(1.43)  | 49<br>(1.49)  | 58<br>(1.26)  | 40<br>(1.83)  | 57<br>(1.28)  | 1.26-1.83                            |
| WRKY        | 115 | 100<br>(1.15) | 86<br>(1.34)  | 109<br>(1.06) | 90<br>(1.28)  | 83<br>(1.39)  | 79<br>(1.46)  | 73<br>(1.58)  | 92<br>(1.25)  | 96<br>(1.20)  | 89<br>(1.29)  | 102<br>(1.13) | 94<br>(1.22)  | 1.06-1.58                            |
| bZIP        | 104 | 90<br>(1.16)  | 84<br>(1.24)  | 85<br>(1.22)  | 78<br>(1.33)  | 78<br>(1.33)  | 76<br>(1.37)  | 72<br>(1.44)  | 71<br>(1.46)  | 80<br>(1.30)  | 83<br>(1.25)  | 90<br>(1.16)  | 90<br>(1.16)  | 1.16-1.46                            |
| HB-KNOX     | 9   | 11            | 11            | 10            | 9             | 5             | 8             | 8             | 9             | 9             | 10            | 9             | 9             |                                      |
| DBP         | 8   | 4<br>(2.00)   | 4<br>(2.00)   | 3<br>(2.67)   | 4<br>(2.00)   | 4<br>(2.00)   | 4<br>(2.00)   | 4<br>(2.00)   | 6<br>(1.33)   | 4<br>(2.00)   | 5<br>(1.60)   | 4<br>(2.00)   | 4<br>(2.00)   | 1.33-2.67                            |
| bHLH        | 187 | 153<br>(1.22) | 166<br>(1.13) | 146<br>(1.28) | 133<br>(1.41) | 144<br>(1.30) | 119<br>(1.57) | 123<br>(1.52) | 128<br>(1.46) | 133<br>(1.41) | 130<br>(1.44) | 136<br>(1.38) | 134<br>(1.40) | 1.13-1.57                            |
| zf-HD       | 22  | 14            | 12            | 10            | 10            | 10            | 12            | 11            | 7             | 11            | 21            | 12            | 14            | 1.05-3.14                            |

|              |     |        |        |        |        |        |        |        |        |        |        |        |        |           |
|--------------|-----|--------|--------|--------|--------|--------|--------|--------|--------|--------|--------|--------|--------|-----------|
|              |     | (1.57) | (1.83) | (2.20) | (2.20) | (2.20) | (1.83) | (2.00) | (3.14) | (2.00) | (1.05) | (1.83) | (1.57) |           |
| C2C2-GATA    | 28  | 29     | 25     | 25     | 23     | 26     | 24     | 25     | 28     | 26     | 29     | 21     | 25     |           |
| Alfin-like   | 9   | 5      | 6      | 6      | 6      | 6      | 6      | 6      | 6      | 6      | 9      | 8      | 9      |           |
| E2F-DP       | 11  | 9      | 9      | 9      | 9      | 9      | 8      | 9      | 8      | 9      | 11     | 9      | 7      |           |
| AP2/ERF-ERF  | 198 | 153    | 159    | 166    | 116    | 112    | 130    | 119    | 90     | 155    | 135    | 127    | 139    | 1.19-2.2  |
|              |     | (1.29) | (1.25) | (1.19) | (1.71) | (1.77) | (1.52) | (1.66) | (2.20) | (1.28) | (1.47) | (1.56) | (1.42) |           |
| B3-ARF       | 26  | 23     | 21     | 23     | 20     | 22     | 22     | 23     | 20     | 24     | 26     | 22     | 27     |           |
| HB-HD-ZIP    | 46  | 38     | 35     | 37     | 38     | 31     | 36     | 29     | 32     | 34     | 37     | 34     | 40     | 1.15-1.59 |
|              |     | (1.21) | (1.31) | (1.24) | (1.21) | (1.48) | (1.28) | (1.59) | (1.44) | (1.35) | (1.24) | (1.35) | (1.15) |           |
| LIM          | 6   | 5      | 6      | 6      | 5      | 6      | 4      | 4      | 5      | 4      | 6      | 2      | 6      |           |
| C2C2-YABBY   | 6   | 7      | 7      | 7      | 6      | 6      | 7      | 7      | 7      | 7      | 8      | 9      | 8      |           |
| Trihelix     | 33  | 28     | 30     | 27     | 23     | 27     | 24     | 25     | 20     | 26     | 26     | 25     | 26     | 1.1-1.65  |
|              |     | (1.18) | (1.10) | (1.22) | (1.43) | (1.22) | (1.38) | (1.32) | (1.65) | (1.27) | (1.27) | (1.32) | (1.27) |           |
| HB-BELL      | 14  | 13     | 11     | 12     | 11     | 11     | 12     | 11     | 10     | 11     | 14     | 10     | 13     |           |
| OFP          | 44  | 33     | 32     | 33     | 31     | 30     | 28     | 29     | 19     | 34     | 32     | 28     | 31     | 1.29-2.32 |
|              |     | (1.33) | (1.38) | (1.33) | (1.42) | (1.47) | (1.57) | (1.52) | (2.32) | (1.29) | (1.38) | (1.57) | (1.42) |           |
| NAC          | 165 | 158    | 147    | 143    | 130    | 112    | 115    | 112    | 111    | 139    | 128    | 137    | 135    | 1.04-1.49 |
|              |     | (1.04) | (1.12) | (1.15) | (1.27) | (1.47) | (1.43) | (1.47) | (1.49) | (1.19) | (1.29) | (1.20) | (1.22) |           |
| GARP-G2-like | 58  | 48     | 48     | 48     | 42     | 50     | 51     | 47     | 52     | 44     | 50     | 48     | 46     | 1.12-1.38 |
|              |     | (1.21) | (1.21) | (1.21) | (1.38) | (1.16) | (1.14) | (1.23) | (1.12) | (1.32) | (1.16) | (1.21) | (1.26) |           |
| STAT         | 1   | 1      | 1      | 1      | 1      | 1      | 1      | 1      | 1      | 1      | 1      | 1      | 1      |           |
| SRS          | 5   | 5      | 5      | 5      | 5      | 4      | 5      | 5      | 3      | 5      | 6      | 5      | 5      |           |
| SBP          | 24  | 19     | 18     | 19     | 19     | 18     | 17     | 16     | 16     | 18     | 17     | 17     | 19     | 1.26-1.5  |
|              |     | (1.26) | (1.33) | (1.26) | (1.26) | (1.33) | (1.41) | (1.50) | (1.50) | (1.33) | (1.41) | (1.41) | (1.26) |           |
| CSD          | 4   | 5      | 5      | 5      | 3      | 4      | 5      | 7      | 1      | 3      | 4      | 6      | 2      |           |
| TUB          | 15  | 12     | 12     | 12     | 12     | 12     | 12     | 12     | 15     | 12     | 12     | 24     | 15     |           |
| C2C2-LSD     | 5   | 4      | 4      | 5      | 4      | 5      | 5      | 5      | 4      | 5      | 5      | 6      | 4      |           |
| NF-YB        | 17  | 17     | 14     | 13     | 15     | 14     | 16     | 15     | 15     | 14     | 17     | 19     | 13     |           |
| NF-YC        | 16  | 13     | 15     | 14     | 12     | 14     | 11     | 10     | 11     | 16     | 15     | 11     | 16     |           |
| CPP          | 14  | 11     | 14     | 13     | 9      | 11     | 8      | 14     | 10     | 12     | 9      | 8      | 11     |           |
| TCP          | 27  | 20     | 21     | 20     | 15     | 15     | 22     | 18     | 16     | 23     | 21     | 20     | 20     | 1.17-1.80 |
|              |     | (1.35) | (1.29) | (1.35) | (1.80) | (1.80) | (1.23) | (1.50) | (1.69) | (1.17) | (1.29) | (1.35) | (1.35) |           |
| VOZ          | 3   | 2      | 2      | 2      | 2      | 2      | 2      | 3      | 2      | 2      | 2      | 2      | 2      |           |
| HB-PHD       | 2   | 3      | 3      | 3      | 2      | 3      | 3      | 3      | 3      | 3      | 3      | 3      | 1      |           |
| HSF          | 31  | 27     | 27     | 22     | 24     | 30     | 22     | 22     | 25     | 27     | 24     | 24     | 25     | 1.03-1.41 |

|              |    |              |              |              |              |              |              |              |              |              |              |              |              |           |
|--------------|----|--------------|--------------|--------------|--------------|--------------|--------------|--------------|--------------|--------------|--------------|--------------|--------------|-----------|
| AP2/ERF-RAV  | 14 | 7<br>(2.00)  | 8<br>(1.75)  | 9<br>(1.56)  | 6<br>(2.33)  | 7<br>(2.00)  | 9<br>(1.56)  | 9<br>(1.56)  | 7<br>(2.00)  | 9<br>(1.56)  | 4<br>(3.50)  | 8<br>(1.75)  | 4<br>(3.50)  | 1.56-3.5  |
| EIL          | 7  | 6            | 7            | 7            | 6            | 7            | 7            | 7            | 5            | 7            | 6            | 7            | 9            |           |
| GeBP         | 13 | 10           | 13           | 13           | 7            | 9            | 10           | 10           | 10           | 13           | 15           | 15           | 17           |           |
| CAMTA        | 6  | 6            | 5            | 5            | 6            | 4            | 5            | 5            | 5            | 5            | 7            | 5            | 6            |           |
| Tify         | 24 | 18<br>(1.33) | 19<br>(1.26) | 16<br>(1.50) | 11<br>(2.18) | 16<br>(1.50) | 14<br>(1.71) | 11<br>(2.18) | 12<br>(2.00) | 18<br>(1.33) | 15<br>(1.60) | 10<br>(2.40) | 17<br>(1.41) | 1.26-2.4  |
| NF-YA        | 12 | 6<br>(2.00)  | 6<br>(2.00)  | 7<br>(1.71)  | 7<br>(1.71)  | 5<br>(2.40)  | 7<br>(1.71)  | 7<br>(1.71)  | 7<br>(1.71)  | 7<br>(1.71)  | 7<br>(1.71)  | 7<br>(1.71)  | 11<br>(1.09) | 1.09-2.4  |
| BES1         | 8  | 6            | 7            | 6            | 6            | 6            | 9            | 8            | 8            | 5            | 8            | 9            | 6            |           |
| HRT          | 1  | 1            | 0            | 1            | 1            | 1            | 1            | 1            | 1            | 1            | 1            | 1            | 1            |           |
| GRF          | 14 | 12<br>(1.17) | 8<br>(1.75)  | 10<br>(1.40) | 11<br>(1.27) | 9<br>(1.56)  | 9<br>(1.56)  | 8<br>(1.75)  | 6<br>(2.33)  | 10<br>(1.40) | 12<br>(1.17) | 13<br>(1.08) | 12<br>(1.17) | 1.08-2.33 |
| S1Fa-like    | 2  | 1            | 1            | 1            | 1            | 1            | 1            | 1            | 1            | 0            | 1            | 0            | 2            |           |
| DBB          | 5  | 5            | 5            | 5            | 6            | 5            | 4            | 2            | 4            | 2            | 4            | 3            | 8            |           |
| RWP-RK       | 14 | 14           | 11           | 11           | 12           | 10           | 9            | 9            | 11           | 10           | 16           | 10           | 12           |           |
| C2C2-CO-like | 12 | 11           | 10           | 11           | 9            | 10           | 9            | 9            | 9            | 10           | 10           | 5            | 11           |           |
| LFY          | 1  | 1            | 1            | 1            | 1            | 1            | 1            | 1            | 2            | 1            | 1            | 1            | 1            |           |
| NF-X1        | 5  | 2<br>(2.50)  | 3<br>(1.67)  | 2<br>(2.50)  | 3<br>(1.67)  | 3<br>(1.67)  | 3<br>(1.67)  | 3<br>(1.67)  | 2<br>(2.50)  | 3<br>(1.67)  | 2<br>(2.50)  | 2<br>(2.50)  | 2<br>(2.50)  | 1.67-2.5  |
| ULT          | 1  | 1            | 1            | 1            | 1            | 1            | 1            | 1            | 0            | 1            | 1            | 2            | 2            |           |
| GARP-ARR-B   | 8  | 11           | 10           | 9            | 7            | 14           | 7            | 6            | 8            | 8            | 7            | 9            | 6            |           |
| BBR-BPC      | 2  | 3            | 1            | 2            | 3            | 1            | 3            | 1            | 2            | 2            | 3            | 2            | 4            |           |
| Whirly       | 2  | 3            | 1            | 2            | 3            | 1            | 3            | 1            | 2            | 2            | 2            | 2            | 2            |           |

359 <sup>1</sup>Sc, *Secale cereale* (Weining); Tu, *T. urartu* (G1812); Aet, *Ae. tauschii* (AL8/78); Hv, *Hordeum vulgare* (Morex); DUWA and DUWB, the A and B subgenomes of durum wheat (*T. turgidum* ssp.  
360 *durum*, Svevo); WEWA and WEBW, the A and B subgenomes of wild emmer wheat (*T. turgidum* ssp. *dicoccoides*, Zavitan); TaA, TaB and TaD, the A, B and D subgenomes of common wheat  
361 (*T. aestivum*, Chinese Spring); Bd, *B. distachyon* (Bd21); Os, *O. sativa* ssp. *japonica* (Nipponbare).

362 <sup>2</sup>The families marked in brown had increased members in Weining rye. For example, 1.56-3.50 fold increase for AP2/ERF-RAV, 1.17-1.93 fold increase for AP2/ERF-AP2, and 1.19-2.20 fold  
363 increase for AP2/ERF-ERF.



364 **Supplementary Table 22.** Summary of disease resistance associated genes annotated  
 365 in Weining rye and other grass genomes (subgenomes)<sup>1</sup>

| Genome/<br>subgenome | NBS |     |     |     |    |    | TM-CC | RLP | RLK <sup>2</sup> | Total              |
|----------------------|-----|-----|-----|-----|----|----|-------|-----|------------------|--------------------|
|                      | CN  | CNL | NBS | NL  | TN | TX |       |     |                  |                    |
| Sc                   | 45  | 245 | 45  | 238 | 4  | 3  | 142   | 129 | 1138             | 1,989 <sup>3</sup> |
| TaA                  | 88  | 218 | 96  | 263 | 3  | 2  | 117   | 133 | 916              | 1,836              |
| TaB                  | 175 | 247 | 53  | 267 | 3  | 2  | 97    | 124 | 760              | 1,728              |
| TaD                  | 78  | 226 | 83  | 244 | 3  | 2  | 115   | 154 | 983              | 1,888              |
| Tu                   | 74  | 160 | 156 | 235 | 3  | 2  | 101   | 116 | 774              | 1,621              |
| Aet                  | 45  | 196 | 72  | 242 | 3  | 1  | 130   | 145 | 924              | 1,758              |
| Bd                   | 30  | 149 | 33  | 128 | 1  | 4  | 106   | 57  | 670              | 1,178              |
| Hv                   | 37  | 136 | 59  | 176 | 2  | 2  | 154   | 113 | 829              | 1,508              |
| Os                   | 45  | 199 | 57  | 169 | 2  | 3  | 134   | 112 | 854              | 1,575              |

366 <sup>1</sup>Sc, *Secale cereale* (Weining); Tu, *T. urartu* (G1812); Aet, *Ae. tauschii* (AL8/78); Hv, *Hordeum vulgare* (Morex);  
 367 DUWA and DUWB, the A and B subgenomes of durum wheat (*T. turgidum* ssp. *durum*, Svevo); WEWA and  
 368 WEWB, the A and B subgenomes of wild emmer wheat (*T. turgidum* ssp. *dicoccoides*, Zavitan); TaA, TaB and TaD,  
 369 the A, B and D subgenomes of common wheat (*T. aestivum*, Chinese Spring); Bd, *B. distachyon* (Bd21); Os, *O.*  
 370 *sativa* ssp. *japonica* (Nipponbare).

371 <sup>2</sup>Receptor-like kinase genes were substantially increased in Weining rye compared to other species.

372 <sup>3</sup>Detailed information on the 1,989 disease resistance associated genes of Weining rye is provided in  
 373 Supplementary Data 3.

374 **Supplementary Table 23.** List of gene specific primers used in this study

| Primer set   | Target gene                                                                | Sequence (5' -3')                                                                                    | Use                                                                   |
|--------------|----------------------------------------------------------------------------|------------------------------------------------------------------------------------------------------|-----------------------------------------------------------------------|
| PS-ScFT1     | <i>ScFT1</i><br>(ScWN4R01G446100)                                          | CAGGAGCTGATGTGCTACGA<br>GGGCGGGCCGAGGTTGTAGA                                                         | Analyzing <i>ScFT1</i> expression<br>by qRT-PCR                       |
| PS-ScFT2     | <i>ScFT2</i><br>(ScWN3R01G192500)                                          | ACAGGAGTATCTTTCGGGAC<br>CAGGCCGAGGTTGTAGAGCT                                                         | Analyzing <i>ScFT2</i> expression<br>by qRT-PCR                       |
| PS-ScPpd1    | <i>ScPpd1</i><br>(ScWN2R01G043000)                                         | GGAGGATCATGAACCACGA<br>CTCCAGCTGTGAGAGCGTCT                                                          | Analyzing <i>ScPpd1</i> expression<br>by qRT-PCR                      |
| PS-ScID1     | <i>ScID1.1</i><br>(ScWN6R01G057200)<br><i>ScID1.2</i><br>(ScWN6R01G057300) | GGCATCCTCTTCTCCAGGAA<br>TTGTTGATGTCGTTGCTGCT                                                         | Analyzing <i>ScID1</i> expression<br>by qRT-PCR                       |
| PS-ScFT2-PVX | <i>ScFT2</i><br>(ScWN3R01G192500)                                          | AGGTCAGCACCAGCTAGC<br>ATCGATATGGCCGGGAGGGACAGGGAC<br>CTTAACCGTTCATCGGCG<br>GTCGACTCATTCATCAAGTCTCTTC | Cloning ScFT2 and its derived<br>mutants into the PVX viral<br>vector |
| PS-ScActin   | <i>ScActin</i><br>(ScWN1R01G374800)                                        | CAACGAGCTCCGTGTCGCA<br>GAGGAAGCGTGTATCCCTGTAG                                                        | As an internal control of<br>qRT-PCR                                  |

375

376

377  
378

**Supplementary Table 24.** Amino acid sequences of the 17 FT proteins from grasses and *Arabidopsis thaliana* used in the alignment shown in Supplementary Fig. 4c

| Gene Name      | NCBI accession number or gene id | Species                  | Amino acid sequence                                                                                                                                                                                                                                                                                                                                                                                                                                                                                                                                                                                                                                                                                                                                                                                                                                                                                                                                                                                                                                                                                                                                                                                                                                                                                                                                                                                                                                                                                                                                                                                                                                                                                                                                                               |
|----------------|----------------------------------|--------------------------|-----------------------------------------------------------------------------------------------------------------------------------------------------------------------------------------------------------------------------------------------------------------------------------------------------------------------------------------------------------------------------------------------------------------------------------------------------------------------------------------------------------------------------------------------------------------------------------------------------------------------------------------------------------------------------------------------------------------------------------------------------------------------------------------------------------------------------------------------------------------------------------------------------------------------------------------------------------------------------------------------------------------------------------------------------------------------------------------------------------------------------------------------------------------------------------------------------------------------------------------------------------------------------------------------------------------------------------------------------------------------------------------------------------------------------------------------------------------------------------------------------------------------------------------------------------------------------------------------------------------------------------------------------------------------------------------------------------------------------------------------------------------------------------|
| <i>ScFT1</i>   | ScWN4R01G446100                  | <i>Secale cereale</i>    | MVGSGMQRGDPLVVGRVIGDVVDPF<br>ARRVALRVGYASRDVANGCELRPSAIA<br>DPPRVEVGGPDMRTFYTLVMVDPDAP<br>SPSPDPSLREYLHWLVTDIPGTTGVSF<br>TEVVVCYEGPRPVLGIHRLVFLFQQLG<br>RQTVYAPGWRQNFSTRDFAELYNLGL<br>PVAAYFNCQRETGTGGRRM<br>MAGRDRDPLVVGRVVGDLDPFVRT<br>TNLRVTFGNRAVSNCELKPSMVAQQ<br>PRVEVGGNEMRTFYTLVMVDPDAPSP<br>SDPNLREYLHWLVTDIPGTTGASFGQE<br>LMCYESPRPTMGIHRFVVLVLFQQLGR<br>QTVYAPGWRQHFNTRDFAELYNLGP<br>VAAYFNCQREAGSGGRRMYN<br>MAGRDRDPLVVGRVVGDLDPFVRT<br>TNLRVTFGNRAVSNCELKPSMVAQQ<br>PRVEVGGNEMRTFYTLVMVDPDAPSP<br>SDPNLREYLHWLVTDIPGTTGASFGQ<br>EVMCYESPRPTMGIHRFVVLVLFQQLG<br>RQTVYAPGWRQNFNTRDFAELYNL<br>QPVAAYFNCQREAGSGGRRMYN<br>MVGSSMQRGDPLVVGRVIGDVVDPF<br>VRRVALRVGYASRDVANGCELRPSAIA<br>DQPRVEVGGPDMRTFYTLVMVDPDA<br>PSPDPSLREYLHWLVTDIPATTGVSF<br>GTEVVVCYEGPRPVLGIHRLVFLFQQL<br>GRQTVYAPGWRQNFSTRDFAELYNL<br>LPVAAYFNCQRETGTGGRRM<br>MVGSGMHAQRGDPLVVGRVIGDVVD<br>PFVRRVALRVGYASRDVANGCELRPS<br>AIADPPRVEVGGPDMRTFYTLVMVDP<br>DAPSPDPSLREYLHWLVTDIPATTGV<br>SFGTEVVVCYEGPRPVLGIHRLVFLFQ<br>QLGRQTVYAPGWRQNFSTRDFAELYN<br>LGLPVAAYFNCQRETGTGGRRM<br>MAGRDRDPLVVGRVVGDLDPFVRT<br>TNLRVTFGNRTVSNCELKPSMVAQQP<br>RVEVGGNEMRTFYTLVMVDPDAPSP<br>DPNLREYLHWLVTDIPGTTGASFGQE<br>VMCYESPRPTMGIHRFVVLVLFQQLGR<br>QTVYAPGWRQNFNTRDFAELYNLGP<br>VAAYFNCQREAGSGGRRMYN<br>MAGRDRDPLVVGRVVGDLDPFVRT<br>TNLRVTFGNRTVSNCELKPSMVAQQ<br>PRVEVGGNEMRTFYTLVMVDPDAPSP<br>SDPNLREYLHWLVTDIPGTTGASFGQEV<br>MCYESPRPTMGIHRFVVLVLFQQLGRQ<br>TVYAPGWRQNFNTRDFAELYNLGP<br>VAAYFNCQREAGSGGRRMYN<br>MVGSGMQRGAPLVVGRVIGDVVDPF<br>VRRVALRVGYASRDVANGCELRPSAIA<br>DPPRVEVGGPDMRTFYTLVMVDPDAP<br>SPSPDPSLREYLHWLVTDIPGTTGVSF<br>ACPGTEVVVCYEGPRPVLGIHRLVFLF<br>QQLGRQTVYAPGWRQNFSTRDFAELY<br>NLGLPVAAYFNCQRETGTGGRRM<br>MAGRDRDPLVVGRVVGDLDPFVRT<br>TNLRVTFGNRTVSNCELKPSMVAQQ<br>PRVEVGGNEMRTFYTLVMVDPDAPSP |
| <i>ScFT2</i>   | ScWN3R01G192500                  | <i>Secale cereale</i>    |                                                                                                                                                                                                                                                                                                                                                                                                                                                                                                                                                                                                                                                                                                                                                                                                                                                                                                                                                                                                                                                                                                                                                                                                                                                                                                                                                                                                                                                                                                                                                                                                                                                                                                                                                                                   |
| <i>HvFT1</i>   | AAZ38709.1                       | <i>Hordeum vulgare</i>   |                                                                                                                                                                                                                                                                                                                                                                                                                                                                                                                                                                                                                                                                                                                                                                                                                                                                                                                                                                                                                                                                                                                                                                                                                                                                                                                                                                                                                                                                                                                                                                                                                                                                                                                                                                                   |
| <i>HvFT2</i>   | ABB99414.1                       | <i>Hordeum vulgare</i>   |                                                                                                                                                                                                                                                                                                                                                                                                                                                                                                                                                                                                                                                                                                                                                                                                                                                                                                                                                                                                                                                                                                                                                                                                                                                                                                                                                                                                                                                                                                                                                                                                                                                                                                                                                                                   |
| <i>AetFT1</i>  | XP_020200589.1                   | <i>Aegilops tauschii</i> |                                                                                                                                                                                                                                                                                                                                                                                                                                                                                                                                                                                                                                                                                                                                                                                                                                                                                                                                                                                                                                                                                                                                                                                                                                                                                                                                                                                                                                                                                                                                                                                                                                                                                                                                                                                   |
| <i>AetFT2</i>  | XP_020200153.1                   | <i>Aegilops tauschii</i> |                                                                                                                                                                                                                                                                                                                                                                                                                                                                                                                                                                                                                                                                                                                                                                                                                                                                                                                                                                                                                                                                                                                                                                                                                                                                                                                                                                                                                                                                                                                                                                                                                                                                                                                                                                                   |
| <i>TaFT1-A</i> | TraesCS7A02G115400.1             | <i>Triticum aestivum</i> |                                                                                                                                                                                                                                                                                                                                                                                                                                                                                                                                                                                                                                                                                                                                                                                                                                                                                                                                                                                                                                                                                                                                                                                                                                                                                                                                                                                                                                                                                                                                                                                                                                                                                                                                                                                   |
| <i>TaFT2-A</i> | TraesCS3A02G143100.1             | <i>Triticum aestivum</i> |                                                                                                                                                                                                                                                                                                                                                                                                                                                                                                                                                                                                                                                                                                                                                                                                                                                                                                                                                                                                                                                                                                                                                                                                                                                                                                                                                                                                                                                                                                                                                                                                                                                                                                                                                                                   |
| <i>TaFT1-B</i> | TraesCS7B02G013100.1             | <i>Triticum aestivum</i> |                                                                                                                                                                                                                                                                                                                                                                                                                                                                                                                                                                                                                                                                                                                                                                                                                                                                                                                                                                                                                                                                                                                                                                                                                                                                                                                                                                                                                                                                                                                                                                                                                                                                                                                                                                                   |

|                |                      |                                |                                                                                                                                                                                                                                                                                                                                                                                                                                                                                                                                                                                                                                                                                                                                                                                                                                                                                                                                                                                                                                                                                                                                                                                                                                                                                                                                                                                                                                                                                                                                                                                                                                                                                                                                                                                                                                                                                  |
|----------------|----------------------|--------------------------------|----------------------------------------------------------------------------------------------------------------------------------------------------------------------------------------------------------------------------------------------------------------------------------------------------------------------------------------------------------------------------------------------------------------------------------------------------------------------------------------------------------------------------------------------------------------------------------------------------------------------------------------------------------------------------------------------------------------------------------------------------------------------------------------------------------------------------------------------------------------------------------------------------------------------------------------------------------------------------------------------------------------------------------------------------------------------------------------------------------------------------------------------------------------------------------------------------------------------------------------------------------------------------------------------------------------------------------------------------------------------------------------------------------------------------------------------------------------------------------------------------------------------------------------------------------------------------------------------------------------------------------------------------------------------------------------------------------------------------------------------------------------------------------------------------------------------------------------------------------------------------------|
| <i>TaFT2-B</i> | TraesCS3B02G162000.1 | <i>Triticum aestivum</i>       | SDPNLREYLHWLVTDIPGTTGASFGQ<br>EVMCYESPRPTMGIHRFVFLVLFQQLG<br>RQTVYAPGWRQNFNTRDFAELYNLGP<br>PVAAYFNCQREAGSGGRRMYN<br>MVGSGMHAQRGDPLVVGRVIGDVVD<br>PFVRRVALRVGYASRDVANGCEL RPS<br>AIADPPRVEVGGPDMRTFYTLVSSASA<br>VRTSVRAMLARCLITPPRLLPVSACA<br>QVMVDPDAPSPDPSLREYLHWLVTD<br>IPATTGV SFGTEVVCYEGPRPVLGIHRL<br>VLLLFQQLGRQTVYAPGWRQNFSTRD<br>FAELYNLGLPVAAYFNCQRETGTGG<br>RRM<br>MAGRDRDPLVVGRVVG DVLDPFIRTT<br>NLRVTFGNRTV SNGCELKPSMVAQQP<br>RVEVGGNEMRTFYTLVMVDPDAPSP<br>DPNLREYLHWLVTDIPGTTGASFGQE<br>VMCYESPRPTMGIHRFVFLVLFQQLGR<br>QTVYAPGWRQNFNTRDFAELYNLGP<br>VAAYFNCQREAGSGGRRMYN<br>MVGSGMHAQRGDPLVVGRVIGDVVD<br>PFVRRVALRVGYASRDVANGCEL RPS<br>AIADPPRVEVGGPDMRTFYTLVMVDP<br>DAPSPDPSLREYLHWLVTDIPATTGV<br>SFATEVVCYEGPRPVLGIHRLVLLFQ<br>QLGRQTVYAPGWRQNFSTRDFAELYN<br>LGLPVAAYFNCQRETGTGGRRM<br>MAGSGRDRDPLVVGRVVG DVLDAFV<br>RSTNLKVTYGSKT V SNGCELKPSMVT<br>HQPRVEVGGNDMRTFYTLVMVDPDA<br>PSPSDPNLREYLHWLVTDIPGTTAASF<br>GQEVMCYESPRPTMGIHRLVFLVLFQ<br>LGRQTVYAPGWRQNFNTK DFAELYN<br>LGSPVAAYFNCQREAGSGGRRVYP<br>MAGSGRDRDPLVVGRVVG DVLDAFV<br>RSTNLKVTYGSKT V SNGCELKPSMVT<br>HQPRVEVGGNDMRTFYTLVMVDPDA<br>PSPSDPNLREYLHWLVTDIPGTTAASF<br>GQEVMCYESPRPTMGIHRLVFLVLFQ<br>LGRQTVYAPGWRQNFNTK DFAELYN<br>LGSPVAAYFNCQREAGSGGRRVYN<br>MVGGMMPRGDPLVVGRVIGDVVDPF<br>VRRVSLRVGYASRDVANGCEL RPSAIA<br>DPPRVEVGGPDMRTFYTLVMVDPDAP<br>SPSDPSLREYLHWLVTDIPATTGV SFG<br>TEVVCYESPRPVLGIHRLVLLFQQLG<br>RQTVYAPGWRQNFSTRDFAELYNLGL<br>PVAAYFNCQRESGTGGRRM<br>MAGRDRDPLVVGRVVG DVLDPFVRT<br>TNLRVSFGNRNVSNGCELKPSMVTHQ<br>PRVEVGGNEMRTFYTLVMVDPDAPSP<br>SDPNLREYLHWLVTDIPGTTGASFGQ<br>EVMCYESPRPSMGIHRFVFLVLFQQLG<br>RQTVYAPGWRQNFNTRDFAELYNLGP<br>PVAAYFNCQREAGSGGRRMYP<br>MSINIRDPLIVSRVVG DVLDPFNRSITL<br>KVTYQGREVTNGLDLRPSQVQNKPR<br>VEIGGEDLRNFYTLVMVDPDVPSPSNP<br>HLREYLHWLVTDIPATTGTTFGNEIVC<br>YENPSPTAGIHRVVFILFRQLGRQTVY<br>APGWRQNFNTREFAEIYNLGLPVAAY<br>FYNCQRESGCGGRRL |
| <i>TaFT1-D</i> | TraesCS7D02G111600.1 | <i>Triticum aestivum</i>       |                                                                                                                                                                                                                                                                                                                                                                                                                                                                                                                                                                                                                                                                                                                                                                                                                                                                                                                                                                                                                                                                                                                                                                                                                                                                                                                                                                                                                                                                                                                                                                                                                                                                                                                                                                                                                                                                                  |
| <i>TaFT2-D</i> | TraesCS3D02G144500.1 | <i>Triticum aestivum</i>       |                                                                                                                                                                                                                                                                                                                                                                                                                                                                                                                                                                                                                                                                                                                                                                                                                                                                                                                                                                                                                                                                                                                                                                                                                                                                                                                                                                                                                                                                                                                                                                                                                                                                                                                                                                                                                                                                                  |
| <i>OsFT1</i>   | XP_015641951.1       | <i>Oryza sativa</i>            |                                                                                                                                                                                                                                                                                                                                                                                                                                                                                                                                                                                                                                                                                                                                                                                                                                                                                                                                                                                                                                                                                                                                                                                                                                                                                                                                                                                                                                                                                                                                                                                                                                                                                                                                                                                                                                                                                  |
| <i>OsFT2</i>   | AFK31087.1           | <i>Oryza sativa</i>            |                                                                                                                                                                                                                                                                                                                                                                                                                                                                                                                                                                                                                                                                                                                                                                                                                                                                                                                                                                                                                                                                                                                                                                                                                                                                                                                                                                                                                                                                                                                                                                                                                                                                                                                                                                                                                                                                                  |
| <i>BdFT1</i>   | XP_003565602.1       | <i>Brachypodium distachyon</i> |                                                                                                                                                                                                                                                                                                                                                                                                                                                                                                                                                                                                                                                                                                                                                                                                                                                                                                                                                                                                                                                                                                                                                                                                                                                                                                                                                                                                                                                                                                                                                                                                                                                                                                                                                                                                                                                                                  |
| <i>BdFT2</i>   | XP_003564300.1       | <i>Brachypodium distachyon</i> |                                                                                                                                                                                                                                                                                                                                                                                                                                                                                                                                                                                                                                                                                                                                                                                                                                                                                                                                                                                                                                                                                                                                                                                                                                                                                                                                                                                                                                                                                                                                                                                                                                                                                                                                                                                                                                                                                  |
| <i>AtFT1</i>   | AT1G65480            | <i>Arabidopsis thaliana</i>    |                                                                                                                                                                                                                                                                                                                                                                                                                                                                                                                                                                                                                                                                                                                                                                                                                                                                                                                                                                                                                                                                                                                                                                                                                                                                                                                                                                                                                                                                                                                                                                                                                                                                                                                                                                                                                                                                                  |
