# Supplementary material for: A high-quality genome assembly highlights rye genomic characteristics and agronomically important genes
Source: PubMed Central journal article supplement (PMC8035075; doi:10.1038/s41588-021-00808-z), 2021-03-18

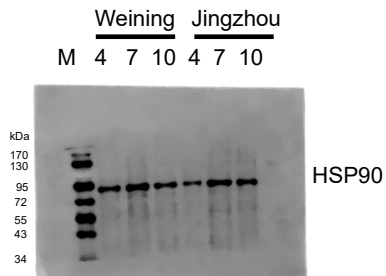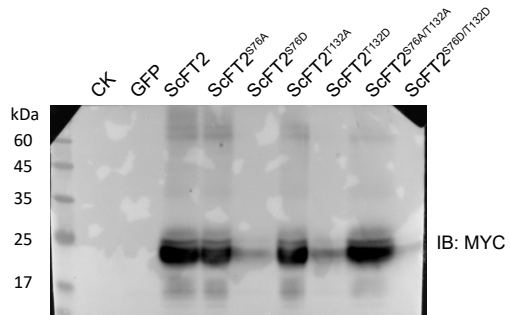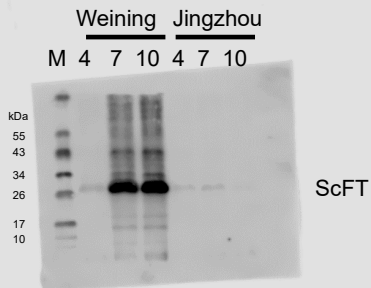

Loading control

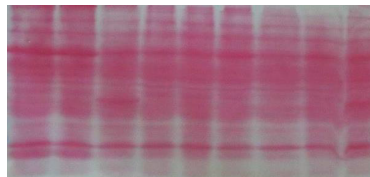

Supplement: 41588_2021_808_MOESM8_ESM.pdf [file 41588_2021_808_MOESM8_ESM.pdf]
